# Supplementary material for: Genome-wide and transcriptome-wide association studies of mammographic density phenotypes reveal novel loci
Source: Breast Cancer Res. 2022 Apr 12;24:27. doi: 10.1186/s13058-022-01524-0 (PMC9006574; doi:10.1186/s13058-022-01524-0)
Supplement: Supplementary file 2 — Additional file 2. Supplementary Tables. [file 13058_2022_1524_MOESM2_ESM.xlsx]

## Sheet: Index
	List of Supplementary Tables:
		Supplementary Table 1.	Information, sample size and the distributions of key variables, by study included in the GWAS analysis.
		Supplementary Table 2.	Information and sample size of previous GWASs with summary statistics collected.
		Supplementary Table 3.	Conditional Analysis identified evidence of multiple independent signals for genome-wide significant locus of DA, NDA and PMD
		Supplementary Table 4.	Replication of novel GWAS significant associations based on a recently published GWAS meta-analysis of mammographic density phenotypes (N = 24,192)
		Supplementary Table 5.	Association between GWAS loci and corresponding mammographic density phenotypes among controls only (N = 21,231)
		Supplementary Table 6.	Association between genome-wide significant SNPs of NDA (p-value < 5E-08) and BMI (N = 13,915)
		Supplementary Table 7.	Association between previously reported genome-wide significant MD loci (N = 46) and corresponding mammographic densitiy phenotype based on the present study
		Supplementary Table 8.	Association between previously reported independent breast cancer significant signals (N = 205) and mammographic density phenotypes (DA, NDA and PMD)
		Supplementary Table 9.	LD-score regression estimated the enrichment of heritaiblity of DA, NDA and PMD by functional genomic annotation
		Supplementary Table 10.	TWAS results of association between genetically predicted gene expression and mammographic dense area (DA)
		Supplementary Table 11.	TWAS results of association between genetically predicted gene expression and mammographic non-dense area (NDA)
		Supplementary Table 12.	TWAS results of association between genetically predicted gene expression and percent mammographic density (PMD)
		Supplementary Table 13.	Replication of TWAS significant associations based on a recently published GWAS meta-analysis of mammographic density phenotypes (N = 24,158)

## Sheet: Table S1.
	Supplementary Table 1. Study-specific Information, sample size and distribution of key variables.
		Study Name	Country	Study Design	Sample Size	MD Phenotyeps Available	Genotyping Platform	Age, yrs Mean (SD)	BMI, kg/m2 Mean (SD)	PMD, % Mean (SD)	DA, cm2 Mean (SD)	NDA, cm2, Mean (SD)
		ABCFS	Australia	Family-based study	100	DA, NDA, PMD	iCOGs + OncoArray	39.5 (6.3)	23.6 (3.8)	45.4 (23.0)	48.2 (30.2)	64.7 (44.7)
		BBCC	Germany	Case-control	361	DA, NDA, PMD	iCOGs	57.1 (10.4)	25.5 (4.6)	38.2 (20.1)	71.2 (37.7)	138.4 (88.8)
		BCEES	Australia	Case-control	697	DA, NDA, PMD	OncoArray	59.9 (7.6)	27.1 (5.4)	10.3 (11.9)	11.0 (12.8)	111.6 (43.4)
		BREOGAN	Spain	Case-control	376	DA, NDA, PMD	OncoArray	52.6 (12.5)	26.2 (4.9)	22.6 (14.1)	29.6 (19.0)	118.1 (61.7)
		CBCS	Canada	Population-based cohort study	1,122 (DA)	DA, NDA, PMD	OncoArray	57.1 (9.8)	25.7 (5.1)	17.7 (13.1)	20.8 (16.1)	117.2 (64.6)
					1,128 (NDA)
					1,105 (PMD)
		FHRISK	UK	Family-based study	371	PMD	OncoArray	45.6 (8.2)	25.4 (5.0)	39.9 (21.0)	-	-
		KCONFAB	Australia	Family-based study	52 (DA)	DA, NDA, PMD	iCOGs	51.9 (8.7)	26.6 (4.4)	27.1 (19.6)	27.7 (24.7)	85.3 (47.8)
					53 (NDA)
					51 (PMD)
		MCBCS	USA	Case-control	1,434 (DA)	DA, NDA, PMD	iCOGs + OncoArray	59.4 (11.5)	27.5 (5.6)	17.8 (12.4)	24.5 (16.9)	138.8 (64.3)
					1,435 (PMD)
					1,468 (NDA)
		MCCS	Australia	Nested Case-control	692	DA, NDA, PMD	iCOGs + OncoArray	58.5 (7.3)	26.5 (4.7)	18.2 (16.6)	21.3 (21.7)	133.6 (66.9)
		MEC	USA	Nested Case-control	101	DA, NDA, PMD	iCOGs	56.0 (8.5)	25.3 (6.3)	28.3 (24.2)	28.9 (24.3)	103.8 (77.1)
		MMHS	USA	Nested Case-control	3,150 (DA, PMD)	DA, NDA, PMD	iCOGs + OncoArray	54.2 (12.8)	27.5 (6.2)	20.5 (14.5)	26.7 (18.4)	127.7 (71.4)
					3,209 (NDA)
		NBCS	Norway	Case-control	39 (DA, PMD)	DA, NDA, PMD	iCOGs	64.5 (5.5)	27.1 (4.8)	15.7 (9.8)	25.4 (16.1)	152.8 (62.4)
					40 (NDA)
		NC-BCFR	USA	Family-based study	58	DA, NDA, PMD	OncoArray	50.0 (8.6)	24.4 (5.5)	37.7 (18.6)	41.2 (23.7)	81.9 (57.9)
		NHS	USA	Nested Case-control	185	DA, NDA, PMD	OncoArray	52.1 (6.9)	24.6 (4.1)	34.5 (20.4)	47.5 (31.8)	104.8 (68.4)
		NHS2	USA	Nested Case-control	1249	DA, NDA, PMD	OncoArray	45.8 (4.7)	26.2 (6.0)	38.4 (17.7)	42.6 (24.3)	76.5 (47.3)
		OFBCR	Canada	Family-based study	155 (DA, PMD)	DA, NDA, PMD	iCOGs + OncoArray	50.4 (7.7)	26.3 (4.8)	36.2 (16.7)	47.4 (27.1)	96.0 (55.1)
					159 (NDA)
		PBCS	Poland	Case-control	125 (DA, PMD)	DA, NDA, PMD	OncoArray	54.9 (9.9)	27.7 (5.2)	28.8 (15.0)	40.7 (25.6)	115.1 (61.9)
					128 (NDA)
		PROCAS	UK	Population-based cohort study	2030	PMD	OncoArray	59.6 (6.8)	26.9 (5.3)	29.2 (17.3)	-	-
		SASBAC	Sweden	Case-control	1,634 (DA)	DA, NDA, PMD	iCOGs	62.8 (6.3)	25.6 (4.0)	16.1 (14.1)	25.5 (23.2)	145.1 (56.6)
					1,636 (NDA)
					1,635 (PMD)
		SIBS/EPIC	UK	Population-based cohort study	1,042 (DA, NDA)	DA, NDA, PMD	iCOGs	59.8 (8.5)	27.3 (5.0)	20.0 (15.9)	24.5 (19.6)	163.5 (71.9)
					1,959 (PMD)
		UKBGS	UK	Nested Case-control	1,233 (DA, NDA)	DA, NDA, PMD	iCOGs + OncoArray	58.6 (5.7)	25.9 (4.3)	26.9 (18.8)	34.1 (24.5)	106.5 (56.3)
					1,252 (PMD)
		Total			13,805 (DA)		up to 6,566 iCOGs	56.6 (10.3)	26.5 (5.3)	23.4 (17.6)	28.5 (23.5)	120.4 (67.1)
					13,915 (NDA)		up to 10,560 OncoArray
					17,126 (PMD)

## Sheet: Table S2.
	Supplementary Table 2. Information and sample size of previous GWASs with summary statistics collected.
		Study Name	Country	Study Design	Sample Size	MD Measures Available	Genotyping Platform
		AMDTSS	Australia	Family-based study	2485	DA, NDA, PMD	OncoArray
		DDM-Spain	Spain	Cross-sectional	274	DA, NDA, PMD	Infinium Human610-Quad BeadChips
		LAMBDA	USA	Family-based study	1472	DA, NDA, PMD	Affymetrix 500k
		MCOCS	USA	Non-Breast Cancer Case-control	356	DA, NDA, PMD	Illumina 610k
		Mayo-VTE	USA	Non-Breast Case-control	317	DA, NDA, PMD	Illumina 660W
		MBCFS	USA	Family-based breast cancer study	595	DA, NDA, PMD	Illumina 660W Quad
		NHS	USA	Nested Breast Cancer Case-control	2856	DA, NDA, PMD	Affymetrix 500k (147 Controls); Illumina HumanHap 550 (951 Cases + 962 Controls); Illumina OmniExpress (151 Cases + 645 Controls)
		SASBAC	Sweden	Breast Cancer Case-control	1274	DA, NDA, PMD	Illuminal HumanHap 300 (528 Cases); Illumina HumanHap 550 (746 Controls)
		SIBS	UK	Population-based cohort study	1145	DA, NDA, PMD	Illumina HumanCytoSNP-12
		Total			10774

## Sheet: Table S3.
	Supplementary Table 3. Conditional Analysis identified evidence of multiple independent signals for genome-wide significant locus of DA, NDA and PMD
									Secondary Signal
		Signal	Lead SNP	Chromosome	Position	MAF	Main Analysis P	Any Seconary Signal	rs ID	Position	r2 with Lead SNP	MAF	Main Analysis P	Conditional P	Beta before Conditional Analysis	Beta after Conditional Analysis
		DA Signals
		1q21.2	rs11205303	1	149906413	0.369	1.25e-11	No
		2q14.2	rs17625845	2	121089731	0.221	1.87e-15	No
		4q13.3	rs6851733	4	75518708	0.226	6.23e-12	No
		5q11.2	rs150249911	5	52119132	0.018	3.06e-09	No
		5q23.2	rs335189	5	122446856	0.265	2.84e-11	No
		5q35.1	rs2042239	5	169566329	0.354	8.87e-09	Yes	rs180727009	169492248	0.008	0.013	8.99e-06	4.65e-06	0.278	0.273
		6q25.1	rs9397436	6	151952002	0.073	1.86e-15	No
		7p11.2	rs10155920	7	55308930	0.145	8.66e-09	No
		8q24.13	rs58847541	8	124610166	0.153	2.05e-09	No
		10q21.2	rs10995187	10	64273026	0.148	4.14e-19	Yes	rs16917327	64272616	0.015	0.071	3.579e-08	1.31183e-06	0.0995	0.113272
		11p15.5	rs4980383	11	1902097	0.451	4.9e-13	No
		12p12.1	rs11836164	12	26446625	0.248	1.66e-09	No
		12p11.2	rs7297051	12	28174817	0.233	7.01e-10	No
		12q23.2	rs833472	12	103005100	0.032	9.76e-13	No
		19q13.33	rs1231281	19	49239200	0.458	6.87e-12	No
		20q13.13	rs17789629	20	48892374	0.137	4.3e-08	Yes	rs2869981	48939095	0.002	0.281	4.295e-08	7.01408e-07	0.0587	0.067
		22q13.1	rs34066050	22	38612604	0.467	3.14e-08	No
		22q13.2	rs6001939	22	40892794	0.102	1.48e-18	Yes	rs145874315	40923135	0.246	0.175	9.277e-14	2.82014e-06	-0.0982	-0.120329
		NDA Signals
		1p12	rs78395856	1	119495096	0.046	3.29e-08	No
		5q14.1	rs413472	5	80930992	0.445	2.84e-08	No
		8p11.23	rs16885613	8	36848357	0.148	1.92e-37	Yes	rs12115097	36919851	0.03	0.017	7.046e-06	6.00222e-06	0.2379	0.247987
		10q21.2	rs2138555	10	64220494	0.419	3.63e-09	No
		12q22	rs61938093	12	96026737	0.29	3.72e-10	No
		22q13.2	rs73169097	22	41027870	0.1	1.83e-09	No
		PMD Signals
		1q21.2	rs1868992	1	149908108	0.259	3.44e-08	No
		5q23.2	rs335189	5	122446856	0.265	5.78e-10	No
		5q31.1	rs76876329	5	131237759	0.151	3.21e-08	No
		5q33.3	rs11745230	5	158171008	0.166	6.9e-09	No
		5q35.1	rs2112670	5	169557594	0.345	2.17e-08	No
		6p22.3	rs3819405	6	16399557	0.34	6.42e-09	No
		6q25.1	rs4897107	6	149601591	0.162	7.81e-12	No
		6q25.1	rs9397436	6	151952002	0.073	2.81e-13	No
		8p11.23	rs10087804	8	36858140	0.142	3.35e-10	No
		10q21.2	rs10995187	10	64273026	0.148	1.92e-25	No
		11p15.5	rs4980383	11	1902097	0.451	4.62e-09	No
		12q23.2	rs61941038	12	102989316	0.033	9.37e-11	No
		15q26.1	rs4499190	15	94275057	0.341	1.57e-08	No
		16q12.2	rs11646715	16	53824007	0.456	6.84e-13	No
		19q13.33	rs12462111	19	49171306	0.427	5.02e-09	No

## Sheet: Table S4.
	Supplementary Table 4. Replication of novel GWAS significant associations based on a recently published GWAS Meta-analysis of mammographic density phenotypes (N = 24,192)
										Main Analysis		Replication
		Traits	Region	Lead SNP	Chromosome	Position	Gene	Ref/Alt	MAF	Z-score	P-value	Effect	SE	P-value
		DA	5q11.2	rs150249911	5	52119132	ITGA1	A/G	0.018	-5.928	3.06e-09	-0.0285	0.0358	0.427
		DA	5q35.1	rs2042239	5	169566329	DOCK2	A/G	0.354	6.485	8.87e-09	0.026	0.0091	0.004217
		DA	7p11.2	rs10155920	7	55308930	ELDR	T/C	0.145	5.755	8.66e-09	-0.0018	0.0114	0.8731
		DA	8q24.13	rs58847541	8	124610166	-	A/G	0.153	5.994	2.05e-09	0.0516	0.0122	2.287e-05
		DA	12p11.2	rs7297051	12	28174817	PTHLH	T/C	0.233	6.166	7.01e-10	0.0356	0.0103	0.0005316
		NDA	5q14.1	rs413472	5	80930992	SSBP2	T/C	0.445	5.551	2.84e-08	-0.0029	0.0062	0.6332
		PMD	5q31.1	rs76876329	5	131237759	MEIKIN	T/C	0.151	5.53	3.21e-08	0.0398	0.0106	0.0001645
		PMD	5q33.3	rs11745230	5	158171008	EBF1	T/G	0.166	-5.793	6.9e-09	-0.0422	0.0094	7.464e-06
		PMD	5q35.1	rs2112670	5	169557594	DOCK2	A/G	0.345	-5.598	2.17e-08	-0.0176	0.0074	0.01692
		PMD	16q12.2	rs11646715	16	53824007	FTO	A/G	0.456	7.183	6.84e-13	0.0193	0.0072	0.007419
							、

## Sheet: Table S5.
	Supplementary Table 5. Association between GWAS loci and corresponding mammographic density phenotypes among controls only (N = 21,231)
									Overall Population		Controls Only
		Trait	Region	rs ID	CHR	Position1	REF/ALT	MAF2	Z-score	P-value	Z-score	P-value
		DA	1q21.2	rs11205303	1	149906413	T/C	0.369	-6.772	1.25e-11	-5.48	4.249e-08
		DA	2q14.2	rs17625845	2	121089731	T/C	0.221	7.949	1.87e-15	7.423	1.149e-13
		DA	4q13.3	rs6851733	4	75518708	T/C	0.226	6.874	6.23e-12	5.491	3.991e-08
		DA	5q11.2	rs150249911	5	52119132	A/G	0.018	-5.928	3.06e-09	-4.185	2.85e-05
		DA	5q23.2	rs335189	5	122446856	C/G	0.265	6.655	2.84e-11	6.923	4.409e-12
		DA	5q35.1	rs2042239	5	169566329	A/G	0.354	6.485	8.87e-09	5.337	9.438e-08
		DA	6q25.1	rs9397436	6	151952002	A/G	0.073	7.951	1.86e-15	6.753	1.453e-11
		DA	7p11.2	rs10155920	7	55308930	T/C	0.145	5.755	8.66e-09	4.892	9.979e-07
		DA	8q24.13	rs58847541	8	124610166	A/G	0.153	5.994	2.05e-09	3.448	0.0005639
		DA	10q21.2	rs10995187	10	64273026	A/G	0.148	8.933	4.14e-19	7.323	2.43e-13
		DA	11p15.5	rs4980383	11	1902097	T/C	0.451	-7.228	4.9e-13	-5.525	3.303e-08
		DA	12p12.1	rs11836164	12	26446625	T/C	0.248	6.028	1.66e-09	6.011	1.845e-09
		DA	12p11.2	rs7297051	12	28174817	T/C	0.233	6.166	7.01e-10	5.133	2.855e-07
		DA	12q23.2	rs833472	12	103005100	T/C	0.032	7.134	9.76e-13	5.022	5.107e-07
		DA	19q13.33	rs1231281	19	49239200	A/G	0.458	6.86	6.87e-12	7.071	1.543e-12
		DA	20q13.13	rs17789629	20	48892374	A/C	0.137	-5.478	4.3e-08	-4.834	1.339e-06
		DA	22q13.1	rs34066050	22	38612604	A/G	0.467	-5.534	3.14e-08	-4.896	9.77e-07
		DA	22q13.2	rs6001939	22	40892794	T/C	0.102	8.791	1.48e-18	7.628	2.391e-14
		NDA	1p12	rs78395856	1	119495096	A/C	0.046	5.525	3.29e-08	5.142	2.715e-07
		NDA	5q14.1	rs413472	5	80930992	T/C	0.445	5.551	2.84e-08	3.906	9.395e-05
		NDA	8p11.23	rs16885613	8	36848357	T/C	0.148	-12.788	1.92e-37	-11.359	6.682e-30
		NDA	10q21.2	rs2138555	10	64220494	A/G	0.419	5.9	3.63e-09	3.919	8.885e-05
		NDA	12q22	rs61938093	12	96026737	T/C	0.29	-6.266	3.72e-10	-5.292	1.21e-07
		NDA	22q13.2	rs73169097	22	41027870	T/C	0.1	6.012	1.83e-09	5.175	2.273e-07
		PMD	1q21.2	rs1868992	1	149908108	A/G	0.259	5.517	3.44e-08	4.536	5.742e-06
		PMD	5q23.2	rs335189	5	122446856	C/G	0.265	6.196	5.78e-10	6.504	7.802e-11
		PMD	5q31.1	rs76876329	5	131237759	T/C	0.151	5.53	3.21e-08	5.655	1.561e-08
		PMD	5q33.3	rs11745230	5	158171008	T/G	0.166	-5.793	6.9e-09	-5.03	4.91e-07
		PMD	5q35.1	rs2112670	5	169557594	A/G	0.345	-5.598	2.17e-08	-4.817	1.455e-06
		PMD	6p22.3	rs3819405	6	16399557	T/C	0.34	5.806	6.42e-09	4.782	1.735e-06
		PMD	6q25.1	rs4897107	6	149601591	T/C	0.162	6.842	7.81e-12	5.868	4.414e-09
		PMD	6q25.1	rs9397436	6	151952002	A/G	0.073	7.303	2.81e-13	6.727	1.729e-11
		PMD	8p11.23	rs10087804	8	36858140	C/G	0.142	6.282	3.35e-10	5.262	1.426e-07
		PMD	10q21.2	rs10995187	10	64273026	A/G	0.148	10.424	1.92e-25	8.552	1.213e-17
		PMD	11p15.5	rs4980383	11	1902097	T/C	0.451	-5.86	4.62e-09	-4.917	8.795e-07
		PMD	12q23.2	rs61941038	12	102989316	A/T	0.033	-6.477	9.37e-11	-5.876	4.214e-09
		PMD	15q26.1	rs4499190	15	94275057	G/C	0.341	-5.654	1.57e-08	-5.203	1.956e-07
		PMD	16q12.2	rs11646715	16	53824007	A/G	0.456	7.183	6.84e-13	5.733	9.859e-09
		PMD	19q13.33	rs12462111	19	49171306	T/C	0.427	5.847	5.02e-09	5.667	1.452e-08
		1Genomic positions based on build GRCh37/hg19
		2Minor Allele Frequency, based on the European Ancestry population in the 1000 Genome project

## Sheet: Table S6.
	Supplementary Table 6. Association between genome-wide significant SNPs of NDA (p-value < 5E-08) and BMI (N = 13,915)
		SNP	chr	Position1	REF/ALT	Sample Size_NDA	Pval_NDA	Sample Size_BMI	Pval_BMI
		rs78395856	1	119495096	A/C	24689	3.294e-08	13915	0.2615
		rs413472	5	80930992	T/C	24689	2.843e-08	13915	0.2588
		rs16885613	8	36848357	T/C	24689	1.917e-37	13915	0.249
		rs2138555	10	64220494	A/G	24689	3.629e-09	13915	0.9584
		rs61938093	12	96026737	T/C	24689	8.684e-12	13915	0.1105
		rs73169097	22	41027870	T/C	24688	1.829e-09	13915	0.6756
		1Genomic positions based on build GRCh37/hg19

## Sheet: Table S7.
	Supplementary Table 7. Association between previously reported genome-wide significant MD loci (N = 46) and corresponding mammographic densitiy phenotype based on the present study
		Traits	Region	Lead SNP	Chromosome	Position	Gene	Reference Allele	Effect Allele	Z-score	Sample Size	P-value
		DA	1p32.3	rs6703250	1	51418472	FAF1	T	C	3.448	24579	0.0005655
		DA	1q21.2	rs11205303	1	149906413	MTMR11	T	C	-6.772	24579	1.275e-11
		DA	2p24.1	rs11684853	2	19310918	OSR1	T	G	-4.156	24579	3.236e-05
		DA	2p13.1	rs6715731	2	74346404	TET3, BOLA3	T	G	0.108	23831	0.9139
		DA	2q14.2	rs17625845	2	121089731	INHBB	T	C	7.949	24579	1.873e-15
		DA	2q35	rs66470855	2	218266438	TNS1	T	TG	-2.212	16290	0.02696
		DA	3p25.2	rs67901221	3	12416550	PPARG	A	G	2.592	24579	0.00955
		DA	4q13.3	rs10034692	4	75419787	AREG	A	G	-5.704	24305	1.172e-08
		DA	4q28.1	rs1503613	4	127772368	—	T	G	-2.126	24579	0.03349
		DA	5q23.2	rs186749	5	122454305	PRDM6	A	G	-5.945	24579	2.762e-09
		DA	5q23.2	rs6885843	5	126068500	TEX43, LMNB1	T	C	-2.726	23831	0.006412
		DA	6p22.3	rs3819405	6	16399557	ATXN1	T	C	4.555	24579	5.249e-06
		DA	6q25.1	rs4897108	6	149601768	TAB2	A	G	4.143	24579	3.429e-05
		DA	6q25.1	rs12665607	6	151946629	ESR1	A	T	-6.962	24579	3.354e-12
		DA	10p12.1	rs2642278	10	27936562	RAB18, MKX	T	C	3.585	24579	0.0003374
		DA	10q21.1	rs1892368	10	53674795	PRKG1	A	G	2.423	24579	0.0154
		DA	10q21.2	rs10995190	10	64278682	ZNF365	A	G	8.892	24579	6e-19
		DA	11p15.5	rs3817198	11	1909006	LSP1	T	C	6.121	24579	9.296e-10
		DA	11p15.4	rs11040963	11	6713214	MRPL17, OR2AG2	A	C	2.477	24579	0.01325
		DA	12p12.1	rs1818476	12	26445564	SSPN, ITPR2	T	C	5.047	24579	4.49e-07
		DA	12q23.2	rs703556	12	103011894	IGF1, PAH	A	G	-7.126	23988	1.035e-12
		DA	14q24.1	rs75197674	14	68971452	RAD51B	T	C	-1.76	24579	0.07848
		ADV	17q24.3	rs9302903	17	67836371	MAP2K6, KCNJ16	T	C	-3.608	24579	0.0003089
		DA	18q21.33	rs11877925	18	60896694	BCL2	A	G	3.646	24579	0.0002661
		DA	19q13.33	rs492602	19	49206417	FUT2	A	G	-5.629	24579	1.813e-08
		DA	20q13.13	rs17196752	20	48887268	SMIM25	T	C	-4.731	24579	2.232e-06
		DA	22q13.1	rs7289126	22	38628306	TMEM184B	A	C	4.866	24578	1.139e-06
		DA	22q13.1	rs17001868	22	40778231	SGSM3, MRTFA	A	C	-7.462	24578	8.539e-14
		NDA	1p36.11	rs61777307	1	23959319	MDS2	A	G	3.925	23927	8.677e-05
		NDA	1p12	rs10802015	1	118782659	SPAG17	T	C	3.206	24689	0.001345
		NDA	1p12	rs1779445	1	119508412	TBX15	T	C	5.029	24689	4.927e-07
		NDA	2q14.2	rs4849864	2	121089570	INHBB	A	T	-3.591	24689	0.0003292
		NDA	2p23.3	rs6718628	2	25131170	ADCY3	C	G	2.251	23927	0.02436
		NDA	2q14.2	rs11123556	2	121245996	INHBB, GLI2	A	G	-4.008	24689	6.128e-05
		NDA	3p25.2	rs199689761	3	12441088	PPARG	T	TA	-1.959	16400	0.05009
		NDA	3p14.1	rs4132228	3	64708114	ADAMTS9	T	C	3.361	24689	0.0007752
		NDA	4q13.3	rs10034692	4	75419787	AREG	A	G	-2.544	24415	0.01095
		NDA	6p25.1	rs1294419	6	6742549	LY86, RREB1	C	G	4.185	24689	2.85e-05
		NDA	8p11.23	rs7816345	8	36846109	-	T	C	12.734	24689	3.851e-37
		NDA	10q21.2	rs1949355	10	64218423	ZNF365	A	G	4.1	24689	4.134e-05
		NDA	11p15.2	rs60521023	11	13314102	ARNTL	A	AT	0.285	16400	0.7755
		NDA	11q24.3	rs2875238	11	130282078	ADAMTS8	T	C	0.733	23927	0.4638
		NDA	12q22	rs11836367	12	96027467	USP44, NTN4	T	C	-6.266	24689	3.715e-10
		NDA	15q25.2	rs1812707	15	84547222	ADAMTSL3	T	C	-3.249	24689	0.001156
		PMD	1q21.2	rs11205303	1	149906413	MTMR11	T	C	-5.054	27900	4.328e-07
		PMD	2p24.1	rs34331777	2	19441251	OSR1	CA	C	2.399	19611	0.01645
		PMD	2p23.3	rs11676272	2	25141538	ADCY3	A	G	0.224	27152	0.823
		PMD	2q35	rs66470855	2	218266438	TNS1	T	TG	-4.675	19611	2.933e-06
		PMD	3p25.2	rs76643909	3	12441367	PPARG	T	G	2.692	27900	0.007097
		PMD	4q28.1	rs35589286	4	128192680	INTU	C	G	-3.558	27900	0.0003742
		PMD	5q23.2	rs186749	5	122454305	PRDM6	A	G	-5.62	27900	1.911e-08
		PMD	6p22.3	rs3819405	6	16399557	ATXN1	T	C	5.806	27900	6.417e-09
		PMD	6q25.1	rs4897108	6	149601768	TAB2	A	G	6.328	27900	2.482e-10
		PMD	8p12	rs6558136	8	29523123	DUSP4, SARAF	T	C	1.121	27900	0.2622
		PMD	10q21.2	rs2138555	10	64220494	ZNF365	A	G	-5.471	27900	4.475e-08
		PMD	10q21.2	rs10995190	10	64278682	ZNF365	A	G	10.326	27900	5.365e-25
		PMD	10q25.3	rs2089176	10	115248851	TCF7L2, HABP2	A	G	-4.725	27900	2.301e-06
		PMD	11q24.3	rs6590455	11	130276427	ADAMTS8	T	C	-0.075	27152	0.9399
		PDV	12q24	rs1265507	12	114868138	TBX5	A	G	3.928	27900	8.577e-05
		PMD	13q13.3	rs10219975	13	36269125	NBEA, DCLK1	C	G	1.841	27900	0.06565
		PMD	15q26.1	rs4777948	15	94298239	—	T	G	-5.071	27152	3.96e-07
		PMD	19q13.33	rs1704773	19	49209566	FUT2, MAMSTR	A	G	-4.542	27900	5.57e-06
		PMD	22q13.1	rs7289126	22	38628306	TMEM184B	A	C	5.403	27899	6.556e-08

## Sheet: Table S8.
	Supplementary Table 8. Associations between previously reported independent breast cancer significant SNPs(N = 205) and mammographic density phenotypes (DA, NDA and PMD)
		SNP	chr	Position1	MAF	BrCa effect allele	MD effect allele	MD reference allele	BrCa OR (95%CI)	DA_Zscore	DA_Pvalue	NDA_Zscore	NDA_Pvalue	PMD_Zscore	PMD_Pvalue
		rs10864459	1	10563609	0.284	A	a	g	0.95 (0.94 - 0.97)	-0.479	0.632	-0.642	0.521	0.337	0.7364
		rs616488	1	10566215	0.297	G	a	g	0.95 (0.94 - 0.97)	1.113	0.2657	2.439	0.01474	-0.699	0.4846
		rs2992756	1	18807339	0.487	T	t	c	1.06 (1.05 - 1.08)	-1.479	0.1391	0.309	0.7576	-0.998	0.3184
		rs4233486	1	41380440	0.354	C	t	c	0.97 (0.95 - 0.98)	-0.595	0.5519	0.564	0.5725	-0.211	0.8327
		rs79724016	1	42137311	0.04	G	t	g	0.90 (0.86 - 0.94)	0.621	0.5346	0.392	0.695	0.241	0.8093
		rs1707302	1	46600917	0.336	A	a	g	0.97 (0.95 - 0.98)	-0.567	0.571	-2.141	0.03227	0.671	0.502
		rs140850326	1	50846032	0.472	C	caaagggcaagatctccttttt	c	0.98 (0.96 - 0.99)	4.09	4.322e-05	-1.575	0.1152	3.576	0.0003491
		rs17426269	1	88156923	0.149	A	a	g	1.03 (1.01 - 1.05)	-1.869	0.06162	0.428	0.6684	-1.038	0.2993
		rs11552449	1	114448389	0.158	T	t	c	1.05 (1.03 - 1.08)	-2.127	0.03338	-1.143	0.253	-1.595	0.1107
		rs7529522	1	118230221	0.242	C	t	c	1.04 (1.03 - 1.06)	-0.054	0.9573	-0.181	0.8561	0.542	0.5878
		rs11249433	1	121280613	0.417	G	a	g	1.12 (1.10 - 1.13)	-2.02	0.0434	0.627	0.5305	-1.312	0.1896
		rs12405132	1	145644984	0.359	T	t	c	0.96 (0.95 - 0.98)	-2.289	0.0221	0.322	0.7471	-1.857	0.06332
		rs12048493	1	149927034	0.36	C	a	c	1.05 (1.03 - 1.07)	6.346	2.206e-10	0.792	0.4282	4.902	9.475e-07
		rs4971059	1	155148781	0.316	A	a	g	1.04 (1.02 - 1.05)	-0.165	0.8688	1.433	0.1519	-0.66	0.5094
		rs35383942	1	201437832	0.049	T	t	c	1.11 (1.07 - 1.14)	2.802	0.005084	2.535	0.01124	1.21	0.2264
		rs17489300	1	202179042	0.392	C	a	c	0.99 (0.97 - 1.01)	2.427	0.01521	0.264	0.7921	2.06	0.03941
		rs6678914	1	202187176	0.399	A	a	g	0.99 (0.98 - 1.01)	-2.227	0.02596	-0.01	0.9917	-2.065	0.03891
		rs4951011	1	203766331	0.156	G	a	g	1.02 (1.00 - 1.04)	0.451	0.6523	-0.196	0.8444	-0.901	0.3674
		rs4245739	1	204518842	0.261	C	a	c	1.04 (1.02 - 1.05)	-1.129	0.2591	-1.435	0.1514	-0.485	0.6278
		rs11117758	1	217220574	0.211	A	a	g	0.96 (0.95 - 0.98)	-0.723	0.47	-2.333	0.01965	0.001	0.9995
		rs72755295	1	242034263	0.034	G	a	g	1.11 (1.07 - 1.16)	-1.165	0.2441	-0.182	0.8558	-1.647	0.0996
		rs113577745	2	10135681	0.096	G	c	g	1.06 (1.04 - 1.09)	0.4	0.6894	0.023	0.9817	1.246	0.2128
		rs12710696	2	19320803	0.41	T	t	c	1.03 (1.01 - 1.04)	-4.238	2.253e-05	1.557	0.1194	-4.01	6.071e-05
		rs200648189	2	24739694	0.19	C	ct	c	0.98 (0.96 - 1.00)	-0.06	0.9519	0.651	0.5152	-0.619	0.5359
		rs6725517	2	25129473	0.391	G	a	g	0.96 (0.95 - 0.98)	-0.68	0.4966	-2.325	0.02005	0.744	0.4569
		rs67073037	2	29119585	0.217	T	a	t	1.01 (0.99 - 1.03)	0.192	0.8474	2.71	0.006733	-0.544	0.5866
		rs4577244	2	29120733	0.219	T	t	c	1.01 (0.99 - 1.03)	0.025	0.9798	-2.705	0.006835	0.759	0.4477
		rs6734079	2	29160421	0.216	A	a	t	1.01 (0.99 - 1.03)	-0.009	0.9926	-2.643	0.008228	0.675	0.4995
		rs71801447	2	111925731	0.06	C	cttatgtt	c	1.06 (1.03 - 1.10)	0.148	0.8826	-0.96	0.3373	1	0.3173
		rs11903787	2	121088182	0.259	A	a	g	0.96 (0.94 - 0.98)	6.549	5.804e-11	3.103	0.001917	3.582	0.000341
		rs4849887	2	121245122	0.106	T	t	c	0.92 (0.90 - 0.94)	1.002	0.3165	4	6.342e-05	-0.904	0.366
		rs2016394	2	172972971	0.473	A	a	g	0.96 (0.94 - 0.97)	-0.051	0.9594	3.284	0.001024	-1.451	0.1469
		rs1550623	2	174212894	0.142	G	a	g	0.95 (0.93 - 0.97)	-0.435	0.6638	-0.733	0.4634	0.18	0.8574
		rs74943274	2	201717014	0.019	A	a	g	1.06 (1.00 - 1.13)	-0.348	0.7277	0.599	0.5493	-0.39	0.6964
		rs188686860	2	201733341	0.02	T	t	c	1.06 (1.00 - 1.13)	-0.84	0.4008	1.43	0.1528	-1.126	0.2603
		rs115635831	2	201743594	0.019	G	a	g	1.07 (1.01 - 1.13)	0.401	0.6883	-0.534	0.5935	0.368	0.7131
		rs114962751	2	201935871	0.02	A	a	t	1.07 (1.01 - 1.14)	-0.451	0.6521	0.58	0.562	-0.439	0.6604
		rs1830298	2	202181247	0.308	C	t	c	1.05 (1.03 - 1.07)	0.638	0.5236	-1.899	0.05751	1.29	0.197
		rs4442975	2	217920769	0.465	T	t	g	0.88 (0.86 - 0.89)	-0.515	0.6063	-0.535	0.5923	-0.848	0.3965
		rs34005590	2	217963060	0.046	A	a	c	0.84 (0.81 - 0.87)	-1.196	0.2315	-2.406	0.01614	-0.18	0.8569
		rs16857609	2	218296508	0.259	T	t	c	1.08 (1.06 - 1.10)	2.726	0.006411	-2.648	0.008096	4.631	3.645e-06
		rs12479355	2	227226952	0.217	G	a	g	0.95 (0.93 - 0.97)	1.148	0.2509	-0.39	0.6962	0.93	0.3522
		rs6762644	3	4742276	0.338	G	a	g	1.06 (1.04 - 1.07)	0.736	0.462	0.99	0.3224	0.048	0.962
		rs4973768	3	27416013	0.487	C	t	c	0.98 (0.96 - 0.99)	1.279	0.2008	-0.539	0.59	1.811	0.07014
		rs12493607	3	30682939	0.36	C	c	g	1.06 (1.04 - 1.08)	-2.311	0.02082	0.263	0.7926	-1.818	0.06909
		rs6796502	3	46866866	0.095	A	a	g	0.93 (0.90 - 0.95)	-3.266	0.001091	-0.005	0.9957	-3.117	0.001827
		rs1053338	3	63967900	0.136	G	a	g	1.05 (1.02 - 1.07)	0.158	0.8742	0.546	0.5848	-0.904	0.3658
		rs6805189	3	71532113	0.466	C	t	c	0.96 (0.95 - 0.98)	0.953	0.3408	0.256	0.7976	-0.247	0.8048
		rs13066793	3	87037543	0.082	G	a	g	0.93 (0.90 - 0.95)	1.093	0.2744	0.998	0.3183	0.896	0.3704
		rs9833888	3	99723580	0.213	T	t	g	1.04 (1.02 - 1.06)	0.289	0.7725	-2.354	0.01858	2.497	0.01252
		rs34207738	3	141112859	0.38	C	ctt	c	1.05 (1.04 - 1.07)	0.57	0.5684	-0.573	0.5666	0.482	0.6299
		rs58058861	3	172285237	0.205	A	a	g	1.04 (1.02 - 1.06)	1.728	0.08403	-0.493	0.6217	0.873	0.3828
		rs6815814	4	38816338	0.288	C	a	c	1.04 (1.02 - 1.05)	0.657	0.5111	-2.147	0.03183	1.077	0.2816
		c4_84370124	4	84370124	0.47	TA	ta	taa	1.04 (1.03 - 1.06)	0.693	0.4885	0.912	0.362	-0.517	0.6045
		rs10022462	4	89243818	0.46	T	t	c	1.04 (1.02 - 1.05)	-0.351	0.7259	-0.691	0.4895	0.617	0.537
		rs9790517	4	106084778	0.259	T	t	c	1.04 (1.02 - 1.06)	2.974	0.002941	-0.614	0.5393	2.432	0.01504
		rs77528541	4	126843504	0.127	T	t	g	0.95 (0.93 - 0.98)	-2.457	0.01402	1.161	0.2455	-3.123	0.001788
		rs6828523	4	175846426	0.102	A	a	c	0.91 (0.89 - 0.93)	-0.979	0.3274	0.753	0.4513	-1.593	0.1111
		rs116095464	5	345109	0.051	C	NA	NA	1.07 (1.04 - 1.11)	#VALUE!	NA	#VALUE!	NA	#VALUE!	NA
		rs10069690	5	1279790	0.27	T	t	c	1.05 (1.03 - 1.07)	0.037	0.9705	0.341	0.7335	0.427	0.6691
		rs2242652	5	1280028	0.2	A	a	g	1.05 (1.03 - 1.07)	-0.412	0.6801	0.797	0.4253	-0.065	0.9482
		rs7726159	5	1282319	0.352	A	a	c	1.03 (1.01 - 1.05)	-0.71	0.4778	-0.405	0.6854	-0.123	0.9021
		rs3215401	5	1296255	0.298	A	a	ag	0.93 (0.92 - 0.95)	0.845	0.3979	0.46	0.6453	0.259	0.7957
		rs2736108	5	1297488	0.287	T	t	c	0.94 (0.92 - 0.95)	-0.641	0.5213	-0.546	0.5851	-0.254	0.7997
		rs13162653	5	16187528	0.449	T	t	g	0.97 (0.96 - 0.99)	-0.032	0.9742	-0.61	0.5422	-0.319	0.7498
		rs2012709	5	32567732	0.489	C	t	c	1.01 (0.99 - 1.02)	-1.236	0.2166	-0.803	0.4219	-1.328	0.1841
		rs10941679	5	44706498	0.253	G	a	g	1.14 (1.13 - 1.16)	-1.148	0.251	0.753	0.4514	-2.176	0.02959
		rs72749841	5	49641645	0.155	C	t	c	0.96 (0.94 -- 0.99)	1.738	0.08218	1.382	0.1671	2.285	0.02232
		rs35951924	5	50195093	0.309	AT	a	at	0.95 (0.93 - 0.97)	2.47	0.0135	-1.116	0.2642	2.447	0.01441
		rs62355902	5	56053723	0.159	T	a	t	1.18 (1.16 - 1.21)	-0.028	0.9773	0.262	0.7931	0.105	0.9162
		rs10472076	5	58184061	0.37	C	t	c	1.04 (1.02 - 1.06)	-2.266	0.02345	-0.127	0.8989	-2.267	0.0234
		rs1353747	5	58337481	0.087	G	t	g	0.96 (0.93 - 0.98)	1.057	0.2903	-0.576	0.5647	1.315	0.1884
		rs7707921	5	81538046	0.265	T	a	t	0.95 (0.93 - 0.97)	1.225	0.2205	0.295	0.7683	0.791	0.429
		rs10474352	5	90732225	0.169	T	t	c	0.94 (0.92 - 0.96)	-1.117	0.264	-1.129	0.2589	0.127	0.8986
		rs6882649	5	111217786	0.354	G	t	g	0.98 (0.96 - 0.99)	-1.825	0.06801	0.243	0.808	-1.062	0.288
		rs6596100	5	132407058	0.23	T	t	c	0.96 (0.94 - 0.98)	-1.328	0.1842	-1.464	0.1431	0.32	0.7488
		rs1432679	5	158244083	0.425	C	t	c	1.08 (1.06 - 1.09)	-1.826	0.06782	2.662	0.007765	-3.504	0.0004586
		rs4562056	5	169591487	0.36	T	t	g	1.04 (1.03 - 1.06)	2.912	0.003587	1.65	0.09902	3.015	0.002571
		rs11242675	6	1318878	0.338	C	t	c	0.99 (0.98 - 1.01)	-0.019	0.985	0.726	0.468	0.488	0.6253
		rs9348512	6	10456706	0.354	A	a	c	1.00 (0.99 - 1.02)	1.099	0.2717	0.98	0.3269	-0.874	0.3821
		rs204247	6	13722523	0.431	G	a	g	1.05 (1.03 - 1.06)	-0.139	0.8895	0.892	0.3726	-1.193	0.2327
		rs3819405	6	16399557	0.307	T	t	c	0.96 (0.95 - 0.98)	-4.555	5.249e-06	1.977	0.04803	-5.806	6.417e-09
		rs2223621	6	20621238	0.399	T	t	c	1.03 (1.02 - 1.05)	-1.117	0.2639	-0.067	0.9468	-0.451	0.6522
		rs71557345	6	26680698	0.055	A	a	g	0.92 (0.89 - 0.95)	-0.271	0.7861	0.536	0.5921	-1.079	0.2807
		rs9257408	6	28926220	0.442	C	c	g	1.03 (1.02 - 1.05)	0.409	0.6822	-0.366	0.7141	0.366	0.7144
		rs12207986	6	81094287	0.479	G	a	g	0.96 (0.95 - 0.98)	1.569	0.1166	2.571	0.01013	-0.63	0.5288
		rs17529111	6	82128386	0.234	C	t	c	1.04 (1.02 - 1.06)	-0.265	0.7911	0.83	0.4065	-1.01	0.3123
		rs6569648	6	130349119	0.22	C	t	c	0.96 (0.94 - 0.98)	0.637	0.5242	0.399	0.69	-0.634	0.5258
		rs9485372	6	149608874	0.189	A	a	g	0.95 (0.93 - 0.97)	-4.988	6.1e-07	2.917	0.003535	-6.798	1.059e-11
		rs12662670	6	151918856	0.083	G	t	g	1.13 (1.10 - 1.16)	-5.514	3.505e-08	-1.128	0.2593	-4.708	2.498e-06
		rs3757322	6	151942194	0.323	G	t	g	1.09 (1.07 - 1.10)	-6.633	3.284e-11	-0.332	0.7402	-5.732	9.941e-09
		rs11155804	6	151946152	0.34	A	a	t	1.08 (1.06 - 1.09)	6.504	7.812e-11	-0.263	0.7926	6.076	1.233e-09
		rs9397437	6	151952332	0.075	A	a	g	1.18 (1.14 - 1.21)	7.846	4.288e-15	0.432	0.6659	7.243	4.397e-13
		rs2747652	6	152437016	0.492	T	t	c	0.95 (0.94 - 0.96)	0.808	0.4193	1.913	0.05568	0.488	0.6254
		rs7971	7	21940960	0.35	G	a	g	0.97 (0.95 - 0.98)	1.724	0.08466	0.305	0.7603	1.167	0.2431
		rs17156577	7	28356889	0.122	C	t	c	1.05 (1.03 - 1.08)	-1.649	0.09924	0.182	0.8554	-1.069	0.285
		rs6964587	7	91630620	0.416	T	t	g	1.04 (1.03 - 1.06)	-0.026	0.9791	1.067	0.2858	-0.62	0.5356
		rs17268829	7	94113799	0.272	C	t	c	1.04 (1.03 - 1.06)	0.303	0.7616	-2.546	0.0109	1.772	0.07637
		rs71559437	7	101552440	0.104	A	a	g	0.95 (0.92 - 0.97)	2.283	0.02242	-0.19	0.8496	2.815	0.004874
		rs4593472	7	130667121	0.314	T	t	c	0.95 (0.94 - 0.97)	0.488	0.6254	1.034	0.3011	0.587	0.5571
		rs11977670	7	139942304	0.445	A	a	g	1.05 (1.03 - 1.06)	0.901	0.3677	-0.696	0.4864	1.312	0.1895
		rs720475	7	144074929	0.247	A	a	g	0.96 (0.94 - 0.97)	-0.053	0.958	-3.164	0.001554	1.488	0.1368
		rs66823261	8	170692	0.23	C	t	c	1.04 (1.02 - 1.06)	-1.246	0.2128	-0.204	0.8381	-0.727	0.4674
		rs9693444	8	29509616	0.331	A	a	c	1.06 (1.05 - 1.08)	0.991	0.3218	-2.444	0.01452	1.502	0.133
		rs13365225	8	36858483	0.231	G	a	g	0.93 (0.91 - 0.95)	0.168	0.8669	12.392	2.872e-35	-6.263	3.782e-10
		rs6472903	8	76230301	0.17	G	t	g	0.93 (0.91 - 0.95)	1.896	0.05796	-0.585	0.5586	1.163	0.2449
		rs2943559	8	76417937	0.092	G	a	g	1.11 (1.08 - 1.14)	0.385	0.7002	-0.724	0.4688	0.146	0.8836
		rs514192	8	102478959	0.334	A	a	t	1.04 (1.02 - 1.05)	-0.951	0.3414	-1.416	0.1568	-0.656	0.5117
		rs12546444	8	106358620	0.092	T	a	t	0.94 (0.91 - 0.96)	-0.182	0.8558	0.826	0.4089	-0.521	0.6026
		rs13267382	8	117209548	0.365	A	a	g	1.04 (1.03 - 1.06)	2.219	0.02648	1.243	0.2139	0.965	0.3343
		rs58847541	8	124610166	0.152	A	a	g	1.07 (1.05 - 1.09)	-5.994	2.052e-09	0.212	0.8318	-4.868	1.127e-06
		rs17350191	8	124757661	0.34	T	t	c	1.04 (1.03 - 1.06)	-3.124	0.001784	-0.557	0.5778	-2.254	0.0242
		rs13281615	8	128355618	0.449	G	a	g	1.10 (1.08 - 1.12)	-0.56	0.5757	-1.474	0.1404	1.041	0.2978
		rs11780156	8	129194641	0.208	T	t	c	1.06 (1.04 - 1.08)	2.492	0.01269	-0.547	0.5842	2.002	0.04525
		rs1011970	9	22062134	0.158	T	t	g	1.06 (1.03 - 1.08)	-0.036	0.9709	2.24	0.02511	-0.562	0.5743
		rs10759243	9	110306115	0.333	A	a	c	1.06 (1.04 - 1.07)	0.661	0.5086	-0.288	0.7732	0.685	0.4933
		rs10816625	9	110837073	0.066	G	a	g	1.12 (1.08 - 1.15)	0.183	0.8544	1.505	0.1323	0.672	0.5016
		rs13294895	9	110837176	0.164	T	t	c	1.06 (1.04 - 1.08)	-0.625	0.5322	0.442	0.6586	0.322	0.7476
		rs676256	9	110895353	0.337	C	t	c	0.91 (0.89 - 0.92)	-0.105	0.9165	-0.002	0.9982	0.51	0.6097
		rs1895062	9	119313486	0.378	G	a	g	0.96 (0.95 - 0.98)	4.249	2.145e-05	1.051	0.2934	3.445	0.0005714
		rs10760444	9	129396434	0.423	G	a	g	1.03 (1.01 - 1.04)	-3.657	0.0002556	1.047	0.2951	-3.116	0.001832
		rs8176636	9	136151579	0.214	T	t	tggtgcaggcgcaggaaaaaattgtggcaattcctca	1.04 (1.02 - 1.06)	2.856	0.004288	-1.533	0.1252	2.619	0.008809
		rs2380205	10	5886734	0.432	T	t	c	0.98 (0.97 - 1.00)	-1.099	0.2717	0.61	0.5421	-1.245	0.213
		rs67958007	10	9088113	0.131	T	t	tg	1.07 (1.04 - 1.09)	-0.891	0.373	2.547	0.01086	-1.168	0.2427
		rs7072776	10	22032942	0.322	A	a	g	1.06 (1.05 - 1.08)	0.757	0.449	0.58	0.5616	0.403	0.6871
		rs11814448	10	22315843	0.021	C	a	c	1.16 (1.11 - 1.23)	-0.66	0.5094	0.823	0.4105	-1.963	0.04968
		rs10995190	10	64278682	0.164	A	a	g	0.89 (0.87 - 0.91)	-8.892	6e-19	2.706	0.006817	-10.326	5.365e-25
		rs10995201	10	64299890	0.169	G	a	g	0.89 (0.87 - 0.91)	8.854	8.438e-19	-2.763	0.005728	10.141	3.615e-24
		rs704010	10	80841148	0.367	T	t	c	1.08 (1.06 - 1.10)	0.756	0.4494	-1.357	0.1748	1.264	0.2062
		rs140936696	10	95292187	0.163	CA	caa	c	1.04 (1.02 - 1.06)	-0.393	0.6944	-0.937	0.3485	-0.82	0.412
		rs7904519	10	114773927	0.471	G	a	g	1.05 (1.03 - 1.06)	0.746	0.4558	-0.245	0.8066	1.633	0.1025
		rs6585202	10	114782803	0.471	C	t	c	1.05 (1.03 - 1.06)	0.756	0.4495	-0.114	0.9096	1.568	0.117
		rs11199914	10	123093901	0.349	T	t	c	0.95 (0.94 - 0.97)	0.049	0.9609	0.851	0.3948	-0.195	0.8452
		rs2981578	10	123340311	0.496	T	t	c	0.96 (0.95 - 0.98)	0.924	0.3555	2.195	0.02815	-0.054	0.9569
		rs45631563	10	123349324	0.052	T	a	t	0.80 (0.77 - 0.83)	-0.182	0.8552	-0.607	0.5436	0.836	0.4031
		rs6597981	11	803017	0.492	A	a	g	0.95 (0.94 - 0.97)	-0.136	0.8918	1.392	0.1641	-1.209	0.2266
		rs4980383	11	1902097	0.459	T	t	c	1.08 (1.07 - 1.10)	7.228	4.897e-13	0.364	0.7162	5.86	4.617e-09
		rs3817198	11	1909006	0.352	C	t	c	1.06 (1.04 - 1.07)	-6.121	9.296e-10	-1.072	0.2839	-4.886	1.031e-06
		rs3903072	11	65583066	0.494	T	t	g	0.96 (0.95 - 0.97)	0.528	0.5974	0.532	0.5944	0.627	0.5306
		rs554219	11	69331642	0.149	G	c	g	1.21 (1.18 - 1.25)	1.38	0.1676	-0.981	0.3265	1.669	0.09509
		rs75915166	11	69379161	0.066	A	a	c	1.31 (1.27 - 1.35)	-2.047	0.0407	-1.364	0.1725	-1.265	0.2059
		rs11374964	11	108345515	0.42	GA	g	ga	1.01 (0.99 - 1.02)	-0.909	0.3633	-1.578	0.1147	-0.78	0.4356
		rs74911261	11	108357137	0.02	A	a	g	1.00 (0.95 - 1.05)	2.307	0.02106	0.518	0.6042	1.734	0.08297
		rs11820646	11	129461171	0.36	T	t	c	0.97 (0.95 - 0.98)	-0.672	0.5018	-0.319	0.7499	-0.516	0.606
		rs12422552	12	14413931	0.264	C	c	g	1.05 (1.03 - 1.07)	2.418	0.0156	-1.8	0.07188	2.742	0.006109
		rs10771399	12	28155080	0.102	G	a	g	0.87 (0.85 - 0.89)	4.134	3.57e-05	3.209	0.001331	2.599	0.009341
		rs7297051	12	28174817	0.24	T	t	c	0.89 (0.87 - 0.90)	-6.166	7.013e-10	-2.57	0.01017	-4.082	4.457e-05
		rs202049448	12	85009437	0.314	C	t	c	0.96 (0.95 - 0.98)	1.944	0.05195	-0.358	0.7207	2.052	0.04018
		rs17356907	12	96027759	0.274	G	a	g	0.91 (0.90 - 0.93)	-2.154	0.03128	-6.623	3.524e-11	1.729	0.08378
		rs1292011	12	115836522	0.404	G	a	g	0.92 (0.91 - 0.94)	-0.58	0.5617	2.437	0.01479	-2.029	0.0425
		rs206966	12	120832146	0.17	T	t	c	1.04 (1.02 - 1.06)	0.313	0.7545	-0.887	0.3753	1.279	0.201
		rs11571833	13	32972626	0.007	T	a	t	1.30 (1.21 - 1.41)	1.203	0.2292	1.165	0.2439	0.415	0.6781
		rs12870942	13	73806982	0.313	C	t	c	1.04 (1.02 - 1.05)	-3.4	0.0006739	-1.229	0.2192	-2.7	0.006925
		rs17181761	13	73811471	0.312	C	a	c	1.04 (1.02 - 1.05)	-3.374	0.0007413	-1.107	0.2682	-2.68	0.007353
		rs9573140	13	73813803	0.312	G	a	g	1.04 (1.02 - 1.05)	-3.437	0.0005875	-1.036	0.3002	-2.792	0.005232
		rs6562760	13	73957681	0.244	A	a	g	0.97 (0.95 - 0.98)	-5.055	4.307e-07	-1.456	0.1453	-2.83	0.004649
		rs2181965	13	73960952	0.245	A	a	g	0.97 (0.95 - 0.98)	-5	5.746e-07	-1.499	0.1338	-2.806	0.005016
		rs8002929	13	73964519	0.244	A	a	g	0.97 (0.95 - 0.98)	-4.946	7.577e-07	-1.325	0.1852	-2.855	0.0043
		rs2236007	14	37132769	0.206	A	a	g	0.92 (0.91 - 0.94)	-4.327	1.51e-05	0.899	0.3686	-4.091	4.303e-05
		rs2588809	14	68660428	0.196	T	t	c	1.07 (1.04 - 1.09)	-1.962	0.04972	1.871	0.06139	-2.484	0.01301
		rs999737	14	69034682	0.199	T	t	c	0.92 (0.91 - 0.94)	-3.869	0.0001092	1.559	0.1189	-3.432	0.0005997
		rs941764	14	91841069	0.351	G	a	g	1.04 (1.02 - 1.06)	1.004	0.3153	-0.236	0.8137	0.631	0.5281
		rs11627032	14	93104072	0.266	C	t	c	0.95 (0.93 - 0.96)	-3.819	0.0001339	-1.489	0.1366	-2.825	0.004722
		rs10623258	14	105212261	0.458	CT	ctt	c	1.03 (1.01 - 1.04)	-1.492	0.1358	-0.019	0.9852	-0.534	0.5931
		rs2290203	15	91512067	0.211	A	a	g	0.96 (0.94 - 0.98)	0.953	0.3405	-0.787	0.4314	1.656	0.09772
		rs11076805	16	4106788	0.25	A	a	c	0.98 (0.96 - 1.00)	-0.491	0.6236	-0.583	0.5601	-0.649	0.5166
		rs4784227	16	52599188	0.279	T	t	c	1.24 (0.22 - 0.26)	3.051	0.002283	-0.363	0.7166	3.559	0.0003721
		rs17817449	16	53813367	0.441	G	t	g	0.94 (0.92 - 0.95)	4.64	3.486e-06	-3.099	0.001939	5.845	5.062e-09
		rs11075995	16	53855291	0.241	A	a	t	1.04 (1.02 - 1.06)	-2.182	0.02912	-0.766	0.444	-1.771	0.07655
		rs28539243	16	54682064	0.484	A	a	g	1.01 (0.99 - 1.02)	3.37	0.0007515	-0.997	0.3186	3.75	0.0001766
		rs2432539	16	56420987	0.415	A	a	g	1.03 (1.01 - 1.05)	-1.141	0.2539	1.149	0.2505	-2.153	0.03131
		rs13329835	16	80650805	0.245	G	a	g	1.07 (1.05 - 1.09)	1.162	0.2454	-0.467	0.6403	1.179	0.2385
		rs4496150	16	87085237	0.262	A	a	c	0.96 (0.94 - 0.98)	-2.731	0.006321	0.2	0.8416	-1.914	0.05564
		rs72826962	17	40836389	0.012	T	t	c	1.23 (1.14 - 1.32)	0.351	0.7253	-0.298	0.7656	-0.043	0.9655
		rs2532263	17	44252468	0.175	A	a	g	0.95 (0.93 - 0.97)	-1.014	0.3104	-1.28	0.2005	-0.032	0.9745
		rs2787486	17	53209774	0.285	C	a	c	0.93 (0.92 - 0.95)	1.555	0.12	-1.107	0.2684	1.824	0.06814
		rs745570	17	77781725	0.486	G	a	g	0.97 (0.95 - 0.98)	1.549	0.1214	2.623	0.008724	0.352	0.725
		rs527616	18	24337424	0.395	C	c	g	0.96 (0.94 - 0.97)	-0.492	0.6226	0.151	0.88	-0.547	0.5844
		rs1436904	18	24570667	0.375	G	t	g	0.94 (0.93 - 0.96)	0.585	0.5587	-0.52	0.6027	1.126	0.2602
		rs36194942	18	25401204	0.3	AT	a	at	0.97 (0.95 - 0.98)	-0.47	0.6385	-0.582	0.5605	-0.669	0.5036
		rs117618124	18	29977689	0.043	C	t	c	0.92 (0.88 - 0.95)	4.277	1.898e-05	-0.006	0.9953	3.053	0.002265
		rs6507583	18	42399590	0.063	G	a	g	0.91 (0.88 - 0.94)	1.143	0.2531	-1.321	0.1864	1.43	0.1528
		rs322144	19	11423703	0.47	G	c	g	0.98 (0.96 - 0.99)	-0.054	0.9573	-0.268	0.7891	-0.081	0.9353
		rs78269692	19	13158277	0.053	C	t	c	1.11 (1.06 - 1.15)	1.119	0.2633	-0.486	0.6269	1.507	0.1318
		rs2594714	19	13954571	0.2	A	a	g	0.97 (0.95 - 0.99)	-1.098	0.272	-1.105	0.269	-0.743	0.4575
		rs8170	19	17389704	0.184	A	a	g	1.02 (1.00 - 1.04)	-1.012	0.3113	-0.154	0.8774	-0.384	0.7007
		rs56069439	19	17393925	0.291	A	a	c	1.02 (1.00 - 1.04)	-0.51	0.6097	0.487	0.6265	-0.13	0.8966
		rs67397200	19	17401404	0.293	G	c	g	1.02 (1.00 - 1.04)	0.484	0.6284	-0.649	0.5162	0.249	0.8032
		rs4808801	19	18571141	0.301	G	a	g	0.93 (0.92 - 0.94)	2.224	0.02616	-0.73	0.4652	2.053	0.04011
		rs2965183	19	19545696	0.352	A	a	g	1.03 (1.02 - 1.05)	0.418	0.6763	-0.32	0.7488	0.243	0.8079
		rs113701136	19	30277729	0.32	T	t	c	1.03 (1.01 - 1.05)	0.359	0.7198	0.19	0.8491	0.781	0.435
		rs3760982	19	44286513	0.456	A	a	g	1.05 (1.04 - 1.07)	-0.368	0.7126	-0.497	0.6193	-0.217	0.8281
		rs71338792	19	46183031	0.255	AT	a	at	1.03 (1.01 - 1.05)	-0.708	0.4792	1.809	0.07043	-1.068	0.2857
		rs16991615	20	5948227	0.072	A	a	g	1.08 (1.05 - 1.12)	-0.061	0.9515	-1.056	0.2908	0.473	0.6362
		rs2284378	20	32588095	0.293	T	t	c	1.01 (0.99 - 1.02)	1.647	0.09949	-1.874	0.06092	2.664	0.007714
		rs6122906	20	48945911	0.184	G	a	g	1.04 (1.02 - 1.06)	-4.274	1.921e-05	-0.104	0.9172	-2.812	0.004925
		rs2823093	21	16520832	0.271	A	a	g	0.94 (0.92 - 0.96)	1.673	0.09434	1.705	0.08814	0.744	0.4571
		rs17879961	22	29121087	0.014	G	a	g	1.34 (1.19 - 1.50)	-1.637	0.1016	-1.645	0.1	-0.706	0.4801
		rs132390	22	29621477	0.037	C	t	c	1.08 (1.04 - 1.12)	-0.955	0.3396	0.419	0.6754	-1.48	0.1388
		rs738321	22	38568833	0.382	G	c	g	0.95 (0.94 - 0.97)	4.642	3.453e-06	-1.651	0.09876	4.676	2.918e-06
		c22_39359355_CN0	22	39359355	0.096	CN0	CN0	c	1.08 (1.05 - 1.12)	0.864	0.3873	-1.256	0.2092	0.666	0.5055
		rs6001930	22	40876234	0.127	C	t	c	1.12 (1.09 - 1.15)	8.59	8.705e-18	5.616	1.956e-08	4.624	3.761e-06
		rs73161324	22	42038786	0.067	T	t	c	1.09 (1.06 - 1.13)	-5.988	2.119e-09	-2.324	0.02013	-3.221	0.001279
		rs28512361	22	46283297	0.117	A	a	g	1.07 (1.04 - 1.10)	1.345	0.1786	1.426	0.1539	0.274	0.7839
		1Genomic positions based on build GRCh37/hg19

## Sheet: Table S9.
	Supplementary Table 9. LD-score regression estimated the enrichment of heritaiblity of DA, NDA and PMD by functional genomic annotation
		Phenotype	Category	Prop._SNPs	Prop._h2	Prop._h2_std_error	Enrichment	Enrichment_std_error	Enrichment_p	Coefficient	Coefficient_std_error	Coefficient_z-score
		DA	H3K27ac_HniszL2_0	0.389076	0.876197	0.0691648	2.252	0.177767	7.09606e-11	1.4988e-07	1.41937e-07	1.05596
		DA	H3K27ac_Hnisz.extend.500L2_0	0.420486	0.835181	0.0755738	1.98623	0.17973	2.96104e-08	-8.06033e-08	1.42365e-07	-0.566173
		DA	SuperEnhancer_Hnisz.extend.500L2_0	0.170383	0.424322	0.0476575	2.4904	0.279708	2.92799e-07	1.74633e-07	5.23429e-07	0.333633
		DA	SuperEnhancer_HniszL2_0	0.16721	0.413896	0.0470892	2.47531	0.281617	9.07028e-07	-1.54575e-07	5.29092e-07	-0.292153
		DA	CpG_Content_50kbL2_0	0.0100519	0.012224	0.000428732	1.21609	0.042652	6.99744e-06	3.03513e-08	1.35853e-06	0.0223413
		DA	MAF_Adj_LLD_AFRL2_0	0.00279647	-0.365505	0.0597769	-130.702	21.3758	7.1939e-06	1.97415e-09	5.33185e-09	0.370257
		DA	GERP.NSL2_0	1.74532	3.18816	0.40121	1.82669	0.229878	0.000130052	-3.79017e-10	1.14737e-08	-0.0330336
		DA	DGF_ENCODE.extend.500L2_0	0.53847	0.988124	0.127696	1.83506	0.237147	0.000537438	5.92006e-08	4.94765e-08	1.19654
		DA	H3K4me3_Trynka.extend.500L2_0	0.255139	0.663081	0.119997	2.5989	0.470321	0.00101405	9.71932e-08	7.85854e-08	1.23678
		DA	Repressed_Hoffman.extend.500L2_0	0.718511	0.505333	0.0695844	0.703306	0.0968453	0.00150187	2.62112e-08	4.0272e-08	0.650852
		DA	Enhancer_Hoffman.extend.500L2_0	0.0898451	0.388534	0.0908551	4.32448	1.01124	0.00167836	2.04265e-07	1.57847e-07	1.29406
		DA	H3K9ac_Trynka.extend.500L2_0	0.229855	0.568107	0.105972	2.47159	0.461038	0.00170812	-1.12169e-08	8.9201e-08	-0.125748
		DA	FetalDHS_TrynkaL2_0	0.0839308	0.56371	0.168261	6.71637	2.00475	0.00232386	2.09913e-07	1.74746e-07	1.20125
		DA	DHS_TrynkaL2_0	0.166201	0.811204	0.228028	4.88087	1.37201	0.00250141	1.43546e-07	1.6396e-07	0.875494
		DA	DHS_Trynka.extend.500L2_0	0.496042	0.938508	0.151573	1.89199	0.305565	0.00291875	2.31645e-08	6.39427e-08	0.36227
		DA	Conserved_LindbladTohL2_0	0.0256851	0.345565	0.114412	13.4539	4.4544	0.00353832	5.70154e-07	3.03468e-07	1.87879
		DA	MAFbin9L2_0	0.1011	0.20745	0.0396758	2.05193	0.392441	0.00503335	9.20948e-08	2.21366e-08	4.1603
		DA	H3K4me1_peaks_TrynkaL2_0	0.169823	0.788852	0.213755	4.64516	1.2587	0.00553059	2.43077e-07	1.27951e-07	1.89976
		DA	H3K27ac_PGC2.extend.500L2_0	0.335206	0.639296	0.108007	1.90717	0.322211	0.00603007	9.49044e-08	1.08305e-07	0.876269
		DA	TFBS_ENCODE.extend.500L2_0	0.341215	0.673561	0.130838	1.97401	0.383449	0.0118792	-2.96198e-08	7.035e-08	-0.421034
		DA	Recomb_Rate_10kbL2_0	1.55242	2.4958	0.331284	1.60768	0.213398	0.0123382	6.5344e-09	3.98167e-09	1.64112
		DA	DHS_peaks_TrynkaL2_0	0.110583	0.561419	0.193134	5.07691	1.7465	0.0139144	7.17295e-09	1.81847e-07	0.039445
		DA	H3K9ac_TrynkaL2_0	0.125413	0.45155	0.137011	3.60051	1.09248	0.0152579	1.57925e-07	1.47972e-07	1.06726
		DA	H3K4me1_TrynkaL2_0	0.423685	0.768635	0.148706	1.81417	0.350983	0.0171801	-6.29812e-08	8.85398e-08	-0.711332
		DA	Conserved_LindbladToh.extend.500L2_0	0.330412	0.636308	0.126944	1.9258	0.384198	0.0181475	-1.5755e-10	5.067e-08	-0.00310933
		DA	MAF_Adj_Predicted_Allele_AgeL2_0	3.39244e-06	-0.274838	0.119559	-81014.9	35242.9	0.0271829	-1.30048e-08	8.61592e-09	-1.50939
		DA	UTR_3_UCSC.extend.500L2_0	0.0264553	0.157905	0.06581	5.96877	2.48759	0.0430388	6.65136e-08	2.08662e-07	0.318763
		DA	FetalDHS_Trynka.extend.500L2_0	0.283362	0.624483	0.170023	2.20383	0.60002	0.0432151	-8.17781e-08	7.88316e-08	-1.03738
		DA	WeakEnhancer_Hoffman.extend.500L2_0	0.0887866	0.29659	0.106389	3.34048	1.19826	0.051472	1.26289e-07	1.10474e-07	1.14315
		DA	TFBS_ENCODEL2_0	0.131228	0.483684	0.197284	3.68583	1.50337	0.0621988	1.16519e-07	1.48382e-07	0.785263
		DA	GERP.RSsup4L2_0	0.00814993	0.110366	0.0559023	13.5419	6.85924	0.0663581	2.38809e-07	4.61572e-07	0.517382
		DA	Transcr_Hoffman.extend.500L2_0	0.762095	0.611324	0.0855525	0.802162	0.11226	0.0758906	-5.73932e-08	3.51478e-08	-1.63291
		DA	Repressed_HoffmanL2_0	0.460873	0.236488	0.12841	0.513131	0.278623	0.0780584	3.62849e-08	4.41553e-08	0.821756
		DA	Backgrd_Selection_StatL2_0	0.17772	0.198398	0.0122056	1.11635	0.0686788	0.0797024	2.0705e-08	2.98721e-08	0.69312
		DA	Transcr_HoffmanL2_0	0.345968	0.535939	0.112095	1.5491	0.324004	0.0861891	1.0066e-07	4.00224e-08	2.51509
		DA	H3K4me1_Trynka.extend.500L2_0	0.605819	0.7532	0.084605	1.24327	0.139654	0.0870281	-7.85367e-08	6.2882e-08	-1.24895
		DA	Super_Enhancer_VahediL2_0	0.0207203	0.0535804	0.0200067	2.58589	0.965562	0.0975533	2.26409e-06	1.37983e-06	1.64085
		DA	Nucleotide_Diversity_10kbL2_0	4.6087	4.28577	0.199462	0.929931	0.0432794	0.10262	-5.72062e-10	2.47296e-09	-0.231327
		DA	CTCF_HoffmanL2_0	0.0238662	-0.104552	0.0786092	-4.38078	3.29375	0.105381	-5.55788e-07	2.63542e-07	-2.10891
		DA	Coding_UCSCL2_0	0.0142749	0.114742	0.0639881	8.03804	4.48256	0.118437	1.52814e-08	6.3343e-07	0.0241249
		DA	MAFbin1L2_0	0.102357	0.0478706	0.0367552	0.467681	0.359087	0.135074	2.79311e-09	2.1754e-08	0.128395
		DA	H3K4me3_TrynkaL2_0	0.133011	0.332044	0.136997	2.49637	1.02997	0.142194	-1.25389e-07	1.31112e-07	-0.956353
		DA	TSS_Hoffman.extend.500L2_0	0.0343534	0.135821	0.0709583	3.95364	2.06554	0.152991	1.09058e-07	2.36854e-07	0.460444
		DA	Enhancer_AnderssonL2_0	0.00432768	0.056563	0.0375882	13.07	8.68554	0.162577	8.62865e-07	5.84207e-07	1.47699
		DA	Intron_UCSCL2_0	0.387473	0.314915	0.0524004	0.812741	0.135236	0.166264	6.46853e-08	3.49955e-07	0.184839
		DA	H3K27ac_PGC2L2_0	0.268778	0.44171	0.127531	1.6434	0.474485	0.180495	-1.84879e-07	1.23077e-07	-1.50214
		DA	MAFbin10L2_0	0.0984626	0.0547981	0.0338616	0.556538	0.343903	0.19368	1.11983e-08	2.1042e-08	0.532188
		DA	Promoter_UCSC.extend.500L2_0	0.0380627	0.103938	0.054812	2.73071	1.44004	0.224865	1.85076e-08	4.06304e-07	0.0455511
		DA	UTR_3_UCSCL2_0	0.0111859	0.133965	0.103509	11.9762	9.25353	0.236729	5.4017e-07	9.80424e-07	0.550955
		DA	MAFbin3L2_0	0.0996066	0.0685585	0.0262159	0.688292	0.263194	0.244957	1.63013e-08	1.65404e-08	0.985547
		DA	Enhancer_HoffmanL2_0	0.0419892	0.163311	0.110401	3.88935	2.62927	0.259022	-1.69727e-07	2.7317e-07	-0.621325
		DA	MAFbin4L2_0	0.100696	0.139598	0.0373881	1.38633	0.371298	0.300095	5.37289e-08	2.39322e-08	2.24505
		DA	Promoter_UCSCL2_0	0.030656	0.0897106	0.0587372	2.92637	1.91601	0.308496	-1.45871e-08	4.91676e-07	-0.0296681
		DA	PromoterFlanking_HoffmanL2_0	0.00830845	-0.0403544	0.048167	-4.85703	5.79735	0.317184	-4.31457e-07	4.59509e-07	-0.938953
		DA	TSS_HoffmanL2_0	0.0178321	0.0779232	0.0604307	4.36983	3.38887	0.320253	-8.16191e-08	3.43099e-07	-0.237888
		DA	H3K4me3_peaks_TrynkaL2_0	0.0416488	0.147513	0.115254	3.54183	2.76728	0.34378	5.95816e-08	2.09798e-07	0.283994
		DA	DGF_ENCODEL2_0	0.136006	0.327951	0.222061	2.41131	1.63274	0.371798	-1.1544e-07	1.28918e-07	-0.895449
		DA	Super_Enhancer_Vahedi.extend.500L2_0	0.0211801	0.0351139	0.0160367	1.65787	0.75716	0.384986	-2.25912e-06	1.34813e-06	-1.67574
		DA	MAFbin2L2_0	0.0998554	0.133631	0.0440878	1.33824	0.441516	0.449295	5.01819e-08	2.82275e-08	1.77776
		DA	Typical_Enhancer_Vahedi.extend.500L2_0	0.0261468	0.0613841	0.0509833	2.34767	1.94989	0.486275	3.94979e-07	6.49365e-07	0.608254
		DA	Intron_UCSC.extend.500L2_0	0.396796	0.365936	0.046434	0.922227	0.117022	0.504118	-8.97061e-08	3.49895e-07	-0.25638
		DA	MAFbin8L2_0	0.100229	0.0779375	0.0342468	0.777592	0.341685	0.51623	2.18025e-08	1.99742e-08	1.09153
		DA	Enhancer_Andersson.extend.500L2_0	0.0190351	-0.0158987	0.0578031	-0.835234	3.03667	0.547373	-4.26814e-07	2.3628e-07	-1.80639
		DA	MAFbin7L2_0	0.0997338	0.0803883	0.0323419	0.806029	0.324283	0.550295	2.3133e-08	1.94824e-08	1.18738
		DA	Coding_UCSC.extend.500L2_0	0.0636618	0.112663	0.0976406	1.76971	1.53374	0.610199	-1.32883e-07	9.61947e-08	-1.38139
		DA	MAFbin6L2_0	0.0996422	0.0799573	0.0394208	0.802444	0.395624	0.617698	2.33605e-08	2.23905e-08	1.04332
		DA	UTR_5_UCSC.extend.500L2_0	0.0268651	0.058196	0.0642716	2.16623	2.39238	0.622533	9.84601e-08	1.64915e-07	0.597033
		DA	MAFbin5L2_0	0.0983171	0.109812	0.0316696	1.11691	0.322117	0.715777	3.86401e-08	1.90273e-08	2.03077
		DA	WeakEnhancer_HoffmanL2_0	0.0209872	-0.00709294	0.0791092	-0.337965	3.7694	0.720022	-4.02833e-07	2.71298e-07	-1.48484
		DA	H3K9ac_peaks_TrynkaL2_0	0.0384595	-0.00189055	0.113857	-0.049157	2.96045	0.723487	-3.60265e-07	2.48129e-07	-1.45193
		DA	PromoterFlanking_Hoffman.extend.500L2_0	0.0331865	0.0202583	0.0689927	0.610437	2.07894	0.849696	-5.63434e-08	1.93927e-07	-0.290539
		DA	UTR_5_UCSCL2_0	0.00548417	-0.000803629	0.0345736	-0.146536	6.30426	0.855738	-3.32841e-07	4.61013e-07	-0.721977
		DA	CTCF_Hoffman.extend.500L2_0	0.0708357	0.0804748	0.0965969	1.13608	1.36368	0.919806	1.32736e-07	1.29543e-07	1.02465
		DA	Typical_Enhancer_VahediL2_0	0.0218711	0.0228872	0.0237158	1.04646	1.08434	0.96577	-4.61154e-07	6.55111e-07	-0.703933
		Phenotype	Category	Prop._SNPs	Prop._h2	Prop._h2_std_error	Enrichment	Enrichment_std_error	Enrichment_p	Coefficient	Coefficient_std_error	Coefficient_z-score
		NDA	H3K27ac_HniszL2_0	0.389076	0.819326	0.089976	2.10583	0.231256	9.70625e-07	8.09586e-08	1.27313e-07	0.635901
		NDA	SuperEnhancer_HniszL2_0	0.16721	0.386152	0.0566691	2.30939	0.33891	6.33741e-05	6.96975e-07	4.55343e-07	1.53066
		NDA	H3K4me3_Trynka.extend.500L2_0	0.255139	0.712598	0.119521	2.79298	0.468453	6.92058e-05	8.78506e-08	6.01598e-08	1.46029
		NDA	CpG_Content_50kbL2_0	0.0100519	0.011771	0.000413369	1.17103	0.0411236	0.000108097	-1.92939e-08	1.15185e-06	-0.0167504
		NDA	H3K27ac_Hnisz.extend.500L2_0	0.420486	0.766659	0.090687	1.82327	0.215672	0.000145529	-5.20531e-08	1.27554e-07	-0.408086
		NDA	H3K9ac_TrynkaL2_0	0.125413	0.559942	0.11892	4.46479	0.94823	0.000187518	1.54874e-07	1.05107e-07	1.47348
		NDA	H3K4me1_TrynkaL2_0	0.423685	1.06632	0.179675	2.51677	0.424077	0.000206489	1.54059e-07	7.47106e-08	2.06208
		NDA	H3K9ac_Trynka.extend.500L2_0	0.229855	0.664427	0.120725	2.89064	0.525222	0.000212814	1.10005e-09	7.06109e-08	0.015579
		NDA	SuperEnhancer_Hnisz.extend.500L2_0	0.170383	0.332562	0.0488216	1.95185	0.28654	0.000842962	-7.14997e-07	4.49209e-07	-1.59168
		NDA	MAF_Adj_LLD_AFRL2_0	0.00279647	-0.369319	0.0845781	-132.066	30.2446	0.000891596	-3.5755e-09	5.50737e-09	-0.64922
		NDA	H3K27ac_PGC2.extend.500L2_0	0.335206	0.679613	0.106474	2.02745	0.317638	0.00184811	1.49826e-08	1.03954e-07	0.144127
		NDA	Recomb_Rate_10kbL2_0	1.55242	2.94219	0.432764	1.89522	0.278767	0.00445474	8.65611e-09	3.69152e-09	2.34486
		NDA	Conserved_LindbladTohL2_0	0.0256851	0.285278	0.0985652	11.1068	3.83745	0.00659587	3.84752e-07	1.9737e-07	1.9494
		NDA	GERP.NSL2_0	1.74532	2.67677	0.350073	1.53369	0.200578	0.00736869	-9.60805e-10	9.78908e-09	-0.0981507
		NDA	DGF_ENCODE.extend.500L2_0	0.53847	0.948835	0.155845	1.76209	0.289423	0.00737965	2.92295e-08	4.81406e-08	0.607169
		NDA	Enhancer_Hoffman.extend.500L2_0	0.0898451	0.325422	0.0931518	3.62203	1.0368	0.0114422	-3.53554e-08	1.13205e-07	-0.312314
		NDA	Typical_Enhancer_VahediL2_0	0.0218711	0.103139	0.0345071	4.71575	1.57775	0.0151476	3.85124e-07	3.92096e-07	0.98222
		NDA	Enhancer_AnderssonL2_0	0.00432768	-0.0909454	0.0430647	-21.0148	9.95098	0.0206253	-1.19187e-06	5.26974e-07	-2.26172
		NDA	CTCF_HoffmanL2_0	0.0238662	-0.19834	0.102917	-8.31052	4.31227	0.022761	-4.8646e-07	2.50719e-07	-1.94026
		NDA	TFBS_ENCODE.extend.500L2_0	0.341215	0.699283	0.15644	2.04939	0.45848	0.0251175	4.8674e-08	6.23651e-08	0.780469
		NDA	H3K27ac_PGC2L2_0	0.268778	0.597954	0.143165	2.22471	0.532653	0.0253949	-4.2699e-08	1.17397e-07	-0.363714
		NDA	Nucleotide_Diversity_10kbL2_0	4.6087	4.06954	0.239393	0.883013	0.0519438	0.0254987	-3.94959e-09	2.10281e-09	-1.87824
		NDA	Enhancer_HoffmanL2_0	0.0419892	0.264674	0.102547	6.30338	2.44223	0.0274975	2.05372e-07	1.85055e-07	1.10979
		NDA	Repressed_Hoffman.extend.500L2_0	0.718511	0.562837	0.0715249	0.783339	0.0995461	0.0282322	1.96105e-08	3.79823e-08	0.516307
		NDA	DHS_Trynka.extend.500L2_0	0.496042	0.833615	0.170397	1.68053	0.343514	0.0455424	-8.02986e-09	6.14203e-08	-0.130736
		NDA	TSS_Hoffman.extend.500L2_0	0.0343534	0.163644	0.0721974	4.76354	2.10161	0.0762473	1.42493e-07	1.9724e-07	0.722433
		NDA	MAFbin1L2_0	0.102357	0.0297518	0.0440699	0.290667	0.43055	0.0824673	-1.86274e-08	2.05156e-08	-0.907961
		NDA	Typical_Enhancer_Vahedi.extend.500L2_0	0.0261468	0.0831775	0.0380193	3.18118	1.45407	0.127743	-2.70407e-07	3.62332e-07	-0.746297
		NDA	FetalDHS_Trynka.extend.500L2_0	0.283362	0.528476	0.168343	1.86502	0.59409	0.153458	1.40098e-08	6.43504e-08	0.217712
		NDA	H3K4me3_TrynkaL2_0	0.133011	0.299876	0.119506	2.25453	0.898469	0.164243	-1.04264e-07	9.76337e-08	-1.06791
		NDA	Super_Enhancer_VahediL2_0	0.0207203	0.045412	0.0190822	2.19167	0.92094	0.194591	5.28566e-07	1.1442e-06	0.461951
		NDA	Coding_UCSCL2_0	0.0142749	0.0836068	0.0583101	5.85691	4.08479	0.219452	2.26516e-07	2.28548e-07	0.991106
		NDA	GERP.RSsup4L2_0	0.00814993	0.0880358	0.0655717	10.802	8.04569	0.223904	1.44574e-07	3.90855e-07	0.369892
		NDA	Conserved_LindbladToh.extend.500L2_0	0.330412	0.471493	0.126106	1.42698	0.381661	0.265947	-1.52889e-08	3.68509e-08	-0.414885
		NDA	H3K4me1_peaks_TrynkaL2_0	0.169823	0.397245	0.233286	2.33918	1.3737	0.325792	-3.01052e-08	1.05011e-07	-0.286685
		NDA	Super_Enhancer_Vahedi.extend.500L2_0	0.0211801	0.0397762	0.0201415	1.878	0.950965	0.354586	-5.26261e-07	1.13461e-06	-0.463825
		NDA	UTR_3_UCSC.extend.500L2_0	0.0264553	-0.0142856	0.0442791	-0.539991	1.67374	0.355214	-1.76576e-07	1.22711e-07	-1.43895
		NDA	UTR_5_UCSC.extend.500L2_0	0.0268651	0.0782363	0.0559029	2.91219	2.08088	0.35665	1.76011e-07	1.36447e-07	1.28996
		NDA	H3K9ac_peaks_TrynkaL2_0	0.0384595	0.136269	0.109713	3.5432	2.85268	0.374274	-2.03821e-08	1.65281e-07	-0.123318
		NDA	MAFbin5L2_0	0.0983171	0.0646154	0.0387342	0.657215	0.393972	0.384088	-1.64803e-09	1.80941e-08	-0.0910813
		NDA	CTCF_Hoffman.extend.500L2_0	0.0708357	-0.0159697	0.103404	-0.225446	1.45977	0.397096	7.18877e-08	1.177e-07	0.610773
		NDA	MAFbin4L2_0	0.100696	0.134153	0.0394689	1.33227	0.391962	0.400652	2.48512e-08	2.04847e-08	1.21316
		NDA	Promoter_UCSCL2_0	0.030656	0.0882693	0.068275	2.87935	2.22714	0.404095	4.45539e-07	3.94459e-07	1.12949
		NDA	MAFbin10L2_0	0.0984626	0.131035	0.0420839	1.33081	0.42741	0.430336	2.66979e-08	1.92859e-08	1.38432
		NDA	H3K4me1_Trynka.extend.500L2_0	0.605819	0.684811	0.104257	1.13039	0.172092	0.450786	-1.32051e-07	5.40016e-08	-2.44532
		NDA	UTR_5_UCSCL2_0	0.00548417	-0.0192186	0.0331678	-3.50438	6.04791	0.456982	-4.94323e-07	2.99449e-07	-1.65077
		NDA	PromoterFlanking_Hoffman.extend.500L2_0	0.0331865	0.0809967	0.0661552	2.44065	1.99344	0.470267	-7.0816e-08	1.34005e-07	-0.528458
		NDA	UTR_3_UCSCL2_0	0.0111859	0.0399545	0.0405356	3.57186	3.62381	0.47317	1.70103e-07	2.55654e-07	0.665365
		NDA	DHS_TrynkaL2_0	0.166201	0.316799	0.227992	1.90613	1.37179	0.513519	6.74878e-08	1.56839e-07	0.430299
		NDA	DGF_ENCODEL2_0	0.136006	0.287148	0.233417	2.11129	1.71623	0.513597	2.44203e-08	1.127e-07	0.216684
		NDA	Repressed_HoffmanL2_0	0.460873	0.353746	0.168795	0.767556	0.366251	0.525772	-3.52266e-08	4.28174e-08	-0.822718
		NDA	FetalDHS_TrynkaL2_0	0.0839308	-0.0169499	0.170426	-0.201951	2.03055	0.550188	-2.04943e-07	1.59533e-07	-1.28464
		NDA	PromoterFlanking_HoffmanL2_0	0.00830845	0.0450811	0.0619107	5.42594	7.45153	0.554355	1.243e-07	3.84347e-07	0.323406
		NDA	TSS_HoffmanL2_0	0.0178321	0.0547658	0.0626327	3.07119	3.51236	0.559495	-7.89233e-08	2.8661e-07	-0.275369
		NDA	Backgrd_Selection_StatL2_0	0.17772	0.184586	0.0125796	1.03863	0.0707834	0.574721	3.03731e-08	1.79913e-08	1.68821
		NDA	Transcr_Hoffman.extend.500L2_0	0.762095	0.707544	0.0972795	0.928419	0.127647	0.580571	1.15833e-08	3.2276e-08	0.358883
		NDA	Transcr_HoffmanL2_0	0.345968	0.270448	0.156288	0.781714	0.451741	0.629117	-4.41796e-08	4.30172e-08	-1.02702
		NDA	Intron_UCSC.extend.500L2_0	0.396796	0.417112	0.0450632	1.0512	0.113567	0.651026	2.35627e-10	2.92467e-07	0.000805655
		NDA	WeakEnhancer_HoffmanL2_0	0.0209872	-0.0175413	0.0867679	-0.835809	4.13432	0.655171	-9.46267e-08	2.29747e-07	-0.411874
		NDA	Enhancer_Andersson.extend.500L2_0	0.0190351	0.0427311	0.0539297	2.24486	2.83318	0.658167	2.26845e-07	1.94426e-07	1.16674
		NDA	MAF_Adj_Predicted_Allele_AgeL2_0	3.39244e-06	0.0739016	0.185338	21784.2	54632.8	0.685509	9.06142e-09	8.9266e-09	1.0151
		NDA	Coding_UCSC.extend.500L2_0	0.0636618	0.0398677	0.062237	0.626243	0.977619	0.701077	-1.18475e-07	7.38535e-08	-1.60419
		NDA	DHS_peaks_TrynkaL2_0	0.110583	0.182836	0.200366	1.65339	1.81191	0.719563	2.04052e-08	1.73387e-07	0.117685
		NDA	Intron_UCSCL2_0	0.387473	0.365261	0.0624572	0.942675	0.161191	0.721131	-2.31079e-09	2.92347e-07	-0.00790429
		NDA	H3K4me3_peaks_TrynkaL2_0	0.0416488	0.0759128	0.12714	1.82269	3.05267	0.787903	-3.71038e-08	1.76199e-07	-0.210578
		NDA	MAFbin2L2_0	0.0998554	0.112517	0.0473399	1.1268	0.474085	0.789616	1.50551e-08	2.34072e-08	0.643182
		NDA	Promoter_UCSC.extend.500L2_0	0.0380627	0.0253	0.0491092	0.664693	1.29022	0.794763	-4.10328e-07	3.22821e-07	-1.27107
		NDA	MAFbin8L2_0	0.100229	0.111734	0.0444284	1.11479	0.443267	0.795909	1.68423e-08	2.03587e-08	0.827275
		NDA	MAFbin9L2_0	0.1011	0.112104	0.043801	1.10885	0.433244	0.800702	1.7226e-08	1.99762e-08	0.862328
		NDA	MAFbin7L2_0	0.0997338	0.107442	0.0424028	1.07728	0.42516	0.855579	1.55035e-08	1.98045e-08	0.782829
		NDA	MAFbin3L2_0	0.0996066	0.0932965	0.0401791	0.93665	0.403377	0.875027	9.11013e-09	1.79886e-08	0.506439
		NDA	WeakEnhancer_Hoffman.extend.500L2_0	0.0887866	0.101029	0.0971231	1.13788	1.09389	0.899673	-6.48757e-08	8.53078e-08	-0.76049
		NDA	MAFbin6L2_0	0.0996422	0.10335	0.0432754	1.03721	0.434308	0.931771	1.34147e-08	2.00037e-08	0.670609
		NDA	TFBS_ENCODEL2_0	0.131228	0.118973	0.185906	0.906612	1.41666	0.94734	-7.36046e-08	1.0924e-07	-0.673786
		Phenotype	Category	Prop._SNPs	Prop._h2	Prop._h2_std_error	Enrichment	Enrichment_std_error	Enrichment_p	Coefficient	Coefficient_std_error	Coefficient_z-score
		PMD	H3K27ac_HniszL2_0	0.389076	0.864999	0.0785415	2.22321	0.201867	7.71029e-10	2.0819e-07	1.18993e-07	1.74961
		PMD	GERP.NSL2_0	1.74532	3.73414	0.380453	2.13952	0.217985	2.2337e-08	2.08051e-08	9.60592e-09	2.16586
		PMD	SuperEnhancer_Hnisz.extend.500L2_0	0.170383	0.405907	0.0469572	2.38232	0.275598	1.02155e-06	2.17976e-07	4.31738e-07	0.504881
		PMD	CpG_Content_50kbL2_0	0.0100519	0.0118475	0.000380297	1.17864	0.0378335	8.12322e-06	1.66586e-06	9.71762e-07	1.71427
		PMD	SuperEnhancer_HniszL2_0	0.16721	0.392483	0.0490735	2.34725	0.293485	8.59306e-06	-2.11683e-07	4.3886e-07	-0.482349
		PMD	H3K27ac_Hnisz.extend.500L2_0	0.420486	0.762701	0.0805723	1.81385	0.191617	2.96849e-05	-1.60875e-07	1.18308e-07	-1.35979
		PMD	Conserved_LindbladTohL2_0	0.0256851	0.420841	0.105305	16.3846	4.09984	0.000153522	6.40776e-07	2.23758e-07	2.86369
		PMD	H3K27ac_PGC2.extend.500L2_0	0.335206	0.629704	0.100116	1.87856	0.298671	0.00205378	1.38358e-08	1.03995e-07	0.133042
		PMD	H3K9ac_TrynkaL2_0	0.125413	0.508267	0.130481	4.05275	1.04041	0.0023079	1.85324e-07	1.09197e-07	1.69716
		PMD	H3K4me3_Trynka.extend.500L2_0	0.255139	0.596052	0.115155	2.33618	0.451342	0.00255383	6.52283e-08	6.04744e-08	1.07861
		PMD	H3K4me1_TrynkaL2_0	0.423685	0.879637	0.154983	2.07616	0.365798	0.00291242	3.54842e-08	7.50735e-08	0.472659
		PMD	Enhancer_Hoffman.extend.500L2_0	0.0898451	0.32758	0.0843141	3.64606	0.938439	0.00383201	1.04878e-07	1.06615e-07	0.983707
		PMD	MAF_Adj_LLD_AFRL2_0	0.00279647	-0.260841	0.0788163	-93.275	28.1842	0.00599214	-6.47161e-10	4.63523e-09	-0.139618
		PMD	H3K9ac_Trynka.extend.500L2_0	0.229855	0.538894	0.113128	2.3445	0.492173	0.00651836	-3.94028e-08	7.21564e-08	-0.546074
		PMD	DHS_peaks_TrynkaL2_0	0.110583	0.602604	0.191164	5.44934	1.72869	0.00655004	1.44342e-07	1.47977e-07	0.975436
		PMD	FetalDHS_TrynkaL2_0	0.0839308	0.508552	0.18287	6.05918	2.17881	0.0128646	1.69526e-07	1.64939e-07	1.02781
		PMD	DHS_Trynka.extend.500L2_0	0.496042	0.8702	0.152665	1.75429	0.307767	0.0149382	3.23336e-08	5.44296e-08	0.594043
		PMD	Repressed_Hoffman.extend.500L2_0	0.718511	0.559908	0.0671047	0.779262	0.0933942	0.0162108	2.60992e-08	3.88716e-08	0.67142
		PMD	H3K4me1_peaks_TrynkaL2_0	0.169823	0.635633	0.192874	3.74292	1.13574	0.0169677	9.82563e-08	8.95545e-08	1.09717
		PMD	DHS_TrynkaL2_0	0.166201	0.653984	0.215088	3.93491	1.29415	0.0176693	-5.53609e-08	1.34516e-07	-0.411556
		PMD	CTCF_HoffmanL2_0	0.0238662	-0.188875	0.0913851	-7.91392	3.82907	0.0183587	-5.42115e-07	2.62152e-07	-2.06794
		PMD	DGF_ENCODE.extend.500L2_0	0.53847	0.858599	0.134023	1.59451	0.248897	0.0219967	8.9359e-09	4.24753e-08	0.210379
		PMD	Transcr_Hoffman.extend.500L2_0	0.762095	0.566166	0.0891591	0.742907	0.116992	0.0289975	-6.12455e-08	3.15618e-08	-1.9405
		PMD	TFBS_ENCODE.extend.500L2_0	0.341215	0.629781	0.140248	1.8457	0.411026	0.0410969	1.36308e-08	5.69656e-08	0.239281
		PMD	Coding_UCSCL2_0	0.0142749	0.134906	0.0596815	9.45059	4.18087	0.045949	1.991e-07	4.04454e-07	0.492269
		PMD	Backgrd_Selection_StatL2_0	0.17772	0.198803	0.011577	1.11863	0.065142	0.0514726	3.43602e-08	2.04462e-08	1.68052
		PMD	MAFbin9L2_0	0.1011	0.181923	0.0430051	1.79943	0.425372	0.0579226	5.51835e-08	2.1411e-08	2.57735
		PMD	H3K27ac_PGC2L2_0	0.268778	0.548213	0.145571	2.03965	0.541603	0.0615301	-4.03196e-08	1.22984e-07	-0.327845
		PMD	DGF_ENCODEL2_0	0.136006	0.451463	0.188211	3.31944	1.38385	0.0849492	6.46031e-09	9.95469e-08	0.0648972
		PMD	TSS_Hoffman.extend.500L2_0	0.0343534	0.144837	0.0660526	4.21609	1.92274	0.0914568	2.22726e-07	1.89861e-07	1.1731
		PMD	H3K4me3_peaks_TrynkaL2_0	0.0416488	0.213424	0.110954	5.12438	2.66404	0.107246	1.85007e-07	1.64275e-07	1.1262
		PMD	MAFbin3L2_0	0.0996066	0.0480134	0.0320823	0.48203	0.32209	0.111257	-6.0963e-09	1.65843e-08	-0.367594
		PMD	UTR_3_UCSC.extend.500L2_0	0.0264553	0.109699	0.0527314	4.14658	1.99323	0.11411	3.63384e-08	1.42953e-07	0.254199
		PMD	CTCF_Hoffman.extend.500L2_0	0.0708357	-0.0662079	0.089681	-0.934669	1.26604	0.122972	4.02019e-08	1.16017e-07	0.346518
		PMD	FetalDHS_Trynka.extend.500L2_0	0.283362	0.561321	0.184085	1.98093	0.649647	0.126911	-6.56719e-08	6.81826e-08	-0.963177
		PMD	Intron_UCSCL2_0	0.387473	0.301677	0.0560989	0.778575	0.144781	0.126948	5.50342e-08	3.14445e-07	0.17502
		PMD	Promoter_UCSC.extend.500L2_0	0.0380627	0.11803	0.0520131	3.10094	1.36651	0.127018	3.11435e-07	3.54598e-07	0.878278
		PMD	MAFbin5L2_0	0.0983171	0.148904	0.0342233	1.51453	0.348091	0.132178	4.01349e-08	1.79287e-08	2.23858
		PMD	H3K4me3_TrynkaL2_0	0.133011	0.290478	0.107372	2.18388	0.807245	0.146257	-1.65823e-07	9.59051e-08	-1.72904
		PMD	MAFbin1L2_0	0.102357	0.0492843	0.0382998	0.481493	0.374178	0.159945	-7.56554e-09	2.10224e-08	-0.359881
		PMD	Recomb_Rate_10kbL2_0	1.55242	2.12553	0.384646	1.36917	0.247771	0.16139	2.636e-09	3.45781e-09	0.762332
		PMD	TFBS_ENCODEL2_0	0.131228	0.345435	0.161772	2.63232	1.23275	0.170581	3.55679e-08	1.09254e-07	0.325552
		PMD	UTR_3_UCSCL2_0	0.0111859	0.107224	0.0717428	9.58566	6.41367	0.183381	2.72262e-07	5.61492e-07	0.484891
		PMD	Conserved_LindbladToh.extend.500L2_0	0.330412	0.494571	0.126141	1.49683	0.381767	0.19018	-5.77702e-08	3.59567e-08	-1.60666
		PMD	Transcr_HoffmanL2_0	0.345968	0.513656	0.129853	1.48469	0.375333	0.194281	7.41904e-08	3.68187e-08	2.01502
		PMD	Super_Enhancer_VahediL2_0	0.0207203	0.0433544	0.0177749	2.09236	0.857848	0.200814	1.59066e-06	1.11848e-06	1.42217
		PMD	GERP.RSsup4L2_0	0.00814993	0.083899	0.0598512	10.2944	7.34377	0.20471	-9.57508e-08	3.7991e-07	-0.252035
		PMD	Enhancer_Andersson.extend.500L2_0	0.0190351	-0.0473574	0.0528575	-2.48791	2.77685	0.213538	-3.29974e-07	1.8549e-07	-1.77893
		PMD	Enhancer_HoffmanL2_0	0.0419892	0.161142	0.100289	3.8377	2.38845	0.229526	-8.62827e-08	1.90607e-07	-0.452673
		PMD	H3K4me1_Trynka.extend.500L2_0	0.605819	0.71111	0.0901343	1.1738	0.148781	0.251684	-9.04831e-08	5.29282e-08	-1.70954
		PMD	Nucleotide_Diversity_10kbL2_0	4.6087	4.3942	0.189568	0.953459	0.0411327	0.261366	3.89855e-10	1.91277e-09	0.203817
		PMD	Repressed_HoffmanL2_0	0.460873	0.296008	0.153103	0.642277	0.332201	0.282108	1.62558e-08	4.24206e-08	0.383206
		PMD	WeakEnhancer_Hoffman.extend.500L2_0	0.0887866	0.172408	0.100304	1.94183	1.12972	0.405514	3.12891e-08	8.34581e-08	0.374908
		PMD	PromoterFlanking_Hoffman.extend.500L2_0	0.0331865	0.0827997	0.0629159	2.49498	1.89583	0.435103	2.37794e-09	1.40402e-07	0.0169367
		PMD	UTR_5_UCSC.extend.500L2_0	0.0268651	0.0679907	0.0538932	2.53082	2.00607	0.444239	1.29383e-07	1.27088e-07	1.01806
		PMD	MAFbin8L2_0	0.100229	0.0735619	0.0374337	0.733936	0.373481	0.479252	6.24395e-09	1.7685e-08	0.353066
		PMD	Typical_Enhancer_Vahedi.extend.500L2_0	0.0261468	0.0495632	0.0367433	1.89558	1.40527	0.522848	4.90343e-08	3.56958e-07	0.137367
		PMD	WeakEnhancer_HoffmanL2_0	0.0209872	-0.0282607	0.077303	-1.34657	3.68334	0.524094	-3.01961e-07	2.19453e-07	-1.37597
		PMD	Typical_Enhancer_VahediL2_0	0.0218711	0.038121	0.028479	1.74299	1.30213	0.567895	-6.35898e-08	3.73482e-07	-0.170262
		PMD	Intron_UCSC.extend.500L2_0	0.396796	0.37013	0.0473692	0.932796	0.119379	0.570781	-7.3157e-08	3.14083e-07	-0.232922
		PMD	MAFbin10L2_0	0.0984626	0.0832575	0.0372903	0.845575	0.378726	0.682829	1.24468e-08	1.96592e-08	0.633126
		PMD	Enhancer_AnderssonL2_0	0.00432768	0.0190626	0.0368717	4.4048	8.51996	0.689729	2.99919e-07	4.78894e-07	0.626273
		PMD	UTR_5_UCSCL2_0	0.00548417	0.0171022	0.0293187	3.11846	5.34606	0.692452	-1.9843e-07	3.25819e-07	-0.60902
		PMD	Super_Enhancer_Vahedi.extend.500L2_0	0.0211801	0.0279285	0.0175663	1.31862	0.829376	0.701062	-1.6025e-06	1.10722e-06	-1.44732
		PMD	Promoter_UCSCL2_0	0.030656	0.054085	0.0678878	1.76426	2.21451	0.729795	-3.5918e-07	4.35571e-07	-0.824619
		PMD	MAFbin7L2_0	0.0997338	0.111202	0.0360592	1.11499	0.361554	0.749729	2.33236e-08	1.90623e-08	1.22354
		PMD	Coding_UCSC.extend.500L2_0	0.0636618	0.0409089	0.0755681	0.642598	1.18702	0.760977	-2.01218e-07	7.50536e-08	-2.68099
		PMD	MAF_Adj_Predicted_Allele_AgeL2_0	3.39244e-06	-0.047838	0.156334	-14101.4	46083	0.761904	4.72706e-10	8.59738e-09	0.0549825
		PMD	TSS_HoffmanL2_0	0.0178321	0.0347382	0.0578712	1.94807	3.24534	0.769925	-3.55143e-07	2.60884e-07	-1.3613
		PMD	MAFbin4L2_0	0.100696	0.111174	0.0398926	1.10406	0.39617	0.793665	2.16967e-08	2.1009e-08	1.03273
		PMD	MAFbin6L2_0	0.0996422	0.0890706	0.0452785	0.893905	0.454411	0.815573	1.32301e-08	2.20724e-08	0.599396
		PMD	H3K9ac_peaks_TrynkaL2_0	0.0384595	0.0555371	0.11164	1.44404	2.90281	0.877521	-2.1393e-07	1.9369e-07	-1.1045
		PMD	PromoterFlanking_HoffmanL2_0	0.00830845	0.0135894	0.0501509	1.63561	6.03613	0.915924	-1.17224e-07	3.5352e-07	-0.331592
		PMD	MAFbin2L2_0	0.0998554	0.10361	0.0400143	1.0376	0.400722	0.925324	1.73912e-08	2.17577e-08	0.799313

[truncated: 4 more sheets: Table S10., Table S11., Table S12., Table S13.]
